# Supplementary material for: Parabrachial CGRP neurons modulate active defensive behavior under a naturalistic threat
Source: eLife. 2025 Jan 10;14:e101523. doi: 10.7554/eLife.101523 (PMC11798572; doi:10.7554/eLife.101523)
Supplement: Figure 1—figure supplement 1—source data 1. [file elife-101523-fig1-figsupp1-data1.xlsx]

## Sheet: Figure 1-figure supplement (B)
Waveform correlation	CGRP	Non-CGRP
	0.92	0.52
	0.75	0.45
	0.87	0.49
	0.89	0.33
	0.89	0.15
	0.92	0.45
	0.92	0.29
	0.87	0.5
	0.82	0.58
	0.93	0.14
	0.89	0.46
	0.72	0.21
	0.9	0.38
	0.81	0.17
	0.89	0.59
	0.66	0.65
	0.76	0.55
	0.89	0.87
	0.65	0.19
	0.74	0.41
	0.9	0.43
	0.88	0.64
	0.87	0.76
	0.86	0.54
	0.71	0.28
	0.69	0.68
	0.93	0.43
	0.88	0.26
	0.87	0.68
	0.89	0.75
	0.78	0.53
	0.85	0.79
	0.61	0.55
	0.89	0.32
	0.91	0.33
	0.79	0.61
	0.89	0.66
	0.97	0.24
	0.82	0.72
	0.9	0.81
	0.75	0.49
	0.89	0.64
	0.88	0.48
	0.91	0.11
	0.82	0.31
	0.53	0.76
	0.8	0.67
	0.84	0.43
	0.92	0.24
	0.89	0.26
	0.9	0.25
	0.72	0.47
	0.93	0.49
	0.82	0.63
	0.87	0.6
	0.92	0.47
	0.84	0.8
	0.72	0.64
	0.9	0.3
	0.87	0.64
	0.94	0.62
	0.91	0.5
	0.72	0.58
	0.93	0.29
	0.81	0.21
	0.94	0.56
	0.92	0.87
	0.85	0.23
	0.94	0.34
	0.85	0.67
	0.84	0.64
	0.71	0.51
	0.79	0.43
	0.66	0.6
	0.91	0.38
	0.79	0.4
	0.85	0.36
	0.79	0.57
	0.89	0.35
	0.82	0.66
	0.72	0.48
	0.93	0.83
	0.71	0.57
	0.9	0.47
		0.43
		0.12
		0.08
		0.54
		0.23
		0.6
		0.19
		0.22
		0.73
		0.79
		0.8
		0.69
		0.53
		0.62
		0.24
