# Supplementary material for: Parabrachial CGRP neurons modulate active defensive behavior under a naturalistic threat
Source: eLife. 2025 Jan 10;14:e101523. doi: 10.7554/eLife.101523 (PMC11798572; doi:10.7554/eLife.101523)
Supplement: Figure 1—figure supplement 1—source data 2. [file elife-101523-fig1-figsupp1-data2.xlsx]

## Sheet:  Figure 1-figure supplement (C)
	1	2	3	4	5	6	7	8	9	10	11	12	13	14	15	16	17	18	19	20	21	22	23	24	25	26	27	28	29	30	31	32	33	34	35	36	37	38	39	40	41	42	43	44	45	46	47	48	49
Trial1	0.0561832	0.288516	0.726234	0.72519	0.441538	0.485766	0.0729084	0.0496242	0.315558	0.388688	0.550024	1.39438	1.62762	1.31032	1.03227	0.32361	0.46082	1.99443	2.63784	2.84612	2.11002	1.86903	1.59807	0.554142	0.312106	0.437146	0.279376	1.37028	1.09818	1.30342	0.802248	2.36393	0.98991	2.48218	1.59133	1.97703	2.79873	0.204613	1.96171	1.51079	2.84603	1.16345	2.24231	0.812178	1.54943	2.43937	2.82434	2.77298	0.188449
Trial2	0.0558066	0.039	0.03	0.0223614	0.00561878	0.0210632	0.0336356	0.0138451	0.0247862	0.0193316	0	0.0258956	0.0298028	0.0496616	0.0196375	0.650082	0.125559	0.0843316	0.12624	0.015518	0.0200636	0.092168	0.0252348	0.00798712	0.0566434	0.0605384	0.0136982	2.50984	2.55504	1.3246	0.103466	0.106095	0.0920366	0.300872	0.740564	0.659454	1.43044	2.1041	3.09192	3.636	2.63362	1.05285	0.918668	0.856636	0.75023	0.954644	1.6117	1.33319	0.131034
Trial3	0.0704714	0.0485816	0.0223666	0.0254544	0.0169839	0.028461	0.0158349	0.0454088	0.0756172	0.0120737	0.0179315	0.0369296	0.00576572	0.0792472	0.0145267	0.060559	0.0223102	0.00850038	0.0266792	0.0183446	0.10882	0.43669	0.727766	0.238022	0.264642	0.283674	0.0797676	0.0547572	0.00892378	0.0448388	0.0831326	0.052691	0.0540896	0.729748	1.15674	0.599386	0.821472	0.347474	0.224234	0.258716	0.506468	0.816542	0.943462	0.632242	2.71246	6.04798	6.12472	9.43264	5.08244
Trial4	2.33622	0.40048	1.32371	0.64592	0.695362	0.948134	0.80614	0.747646	0.82794	0.65159	0.79407	1.25905	2.82804	1.30567	0.46276	0.501588	1.28589	1.50632	1.34319	0.917436	0.866034	1.58089	1.03914	0.722926	0.62364	0.860242	0.292124	0.38939	0.121693	0.476608	0.103466	0.106095	0.0920366	0.300872	0.740564	0.659454	1.43044	2.1041	3.09192	3.636	2.63362	1.05285	0.918668	0.856636	0.75023	0.954644	1.6117	1.33319	0.131034
Trial5	2.4535	1.63869	1.03292	0.352914	0.431282	1.8749	0.976874	0.881382	0.30192	0.278848	0.248934	0.667188	0.974762	2.54878	3.26928	0.614961	0.510933	0.0543128	0.0629059	0.113937	0	0.0210265	0.0391877	0.0502529	0.875138	0.608744	0.62746	0.87	0.49	0.12442	0.906646	0.75006	1.02226	1.09	1.12	1.16062	0.82569	0.086258	0.404096	0	0	0.314914	0.993334	1.18733	5.62102	7.48994	12.2714	8.76764	8.87424
Trial6	0.0536508	0.025502	0.032751	0.0287766	0.0222756	0.0322848	0.638564	0.56962	0.52244	0.588	0.409	0.3208	0.23128	0.271536	1.47984	2.65534	2.09664	0.913668	0.142478	0.962072	1.48451	1.73538	1.68373	0.4145	0.268	0.124581	0.0763556	0.0473008	2.5628	0.608752	0.156848	0.0789562	0.197154	0.306914	0.623044	0.706992	0.39492	0.562384	0.283862	0.147444	1.69033	1.72916	0.54916	0.739692	0.291588	0.214044	0.115719	0.0680862	0.0167993
Trial7	0	0.692726	1.16963	0.244376	0.419596	0.251302	0.773516	0.883562	0.280546	0.839862	1.97331	0.780936	0.994634	1.16167	1.40105	1.52931	2.21246	0.297742	0.0966652	0.208662	0.84614	0.61255	0	0	1.27577	0.876114	0.539432	0.644182	0	0	2.2123	1.37922	2.0549	2.04248	2.43196	2.50638	3.13194	3.65622	8.02984	4.10456	3.02886	3.64406	0.579568	0.723498	0.422632	1.70793	0.811466	2.3756	1.79702
Trial8	0	0	0	0	0	0	0	0	0.523118	0.362538	1.51983	1.04778	0.842476	1.02194	0.793904	0.62696	1.2871	1.80759	0.78305	0.90722	0.842882	2.12424	1.52188	0	0	1.35226	0.51588	0.486634	0.732192	0.272168	0.271396	0.37648	1.34319	0.386234	0.325938	0.419184	1.66482	2.87532	2.15536	1.74978	0.15722	0.09896	0.95282	0.2033	0.71174	0.63958	6.93766	7.04572	7.81242
Trial9	0.86047	2.73264	2.34362	1.6543	2.07182	2.5418	2.94488	3.1501	2.2244	1.33197	3.2659	3.1399	2.50058	4.1728	2.01502	2.8483	2.40588	1.38521	1.09201	0	0	1.17824	1.33824	1.25302	1.16606	0.229392	0.41424	0.293458	0.445406	1.55772	1.77233	0.69829	0.941276	0.79292	1.25964	0.267906	0.228444	0.434672	0.317438	0.724824	2.76186	1.6952	1.118	2.48314	2.64126	2.49472	0.92523	1.5078	3.17538
Trial10	0.654034	0	0	0	0	0	0	0	0.566258	0.496989	0.975445	0.96365	1.115	1.32463	1.16536	1.09008	1.1564	0.894679	0.701229	0	0	1.07225	0	0	0	0.536966	0.31537	0.603621	0	0	0.696694	0.632948	0.708899	0.719387	0.987597	0.868268	1.52074	1.67886	2.14828	2.05	2.001	1.96712	1.27858	1.28133	1.72259	2.39863	3.82915	7.1103	3.71035
	\
	0.0105035
	0.0268952
	0.00638298
	0.0675808
	0.0321018
	0
	0.0137458
	0.0402544
	0.034507
	0.0199543
	0.00926978
	0
	0
	0
	0.0198676
	0
	0.0250216
	0.0815604
	0.524504
	0.55494
	0.0709416
	0.57077
	0.624554
	0.452152
	0.244376
	0.369358
	0.215048
	0.123064
	0.0668666
	0.244806
	0.536904
	0.283008
	0.246032
	1.22636
	0.734984
	1.62988
	2.21738
	7.56716
	3.0457
	2.63
	2.42
	2.22646
	1.71257
	1.67725
	1.41343
	0.223464
	0.0801088
	0.022925
	0.211828
	1.42166
	1.38392
	0.636852
	0.426212
	0.438676
	0.330128
	0.944652
	2.05927
	0.833145
	0.342263
	0.22315
	0.352002
	0.108721
	0.504713
	0.92013
	0.150516
	0.113035
	0.849707
	0.88217
	0.880547
	0.0106791
	0.0727458
	0.0353732
	0.0869905
	1.5079
	2.59193
	2.32925
	5.02895
	2.02943
	7.14
	9.793
	12.2637
	7.51428
	10.7043
	17.854
	14.753
	9.20533
	4.63877
	1.55596
	5.65808
	6.80488
	8.60715
	20.8998
	17.4197
	10.7516
	8.09832
	8.93273
	7.80217
	7.58267
	7.68888
	11.7335
	3.28034
	1.81809
	0.16505
	0.67315
	0.99357
	0.158905
	1.30762
	0.244318
	1.32983
	1.6121
	1.80865
	1.72
	1.17
	1.63454
	3.52304
	2.19
	1.52
	0.860874
	0.0544856
	0.050274
	0.0320396
	0.00710394
	0.0790368
	0.0705524
	0.0287844
	0.04
	0.453
	0.0572794
	0.0349964
	0.0381204
	0.04
	0.453
	0.0572794
	0.0349964
	0.0381204
[truncated: 166 more columns]
