# Supplementary material for: Parabrachial CGRP neurons modulate active defensive behavior under a naturalistic threat
Source: eLife. 2025 Jan 10;14:e101523. doi: 10.7554/eLife.101523 (PMC11798572; doi:10.7554/eLife.101523)
Supplement: Figure 1—source data 1. [file elife-101523-fig1-data1.xlsx]

## Sheet: Figure 1C & D
Freezing	Hab	Block1	Block2	Block3	Block4	Block5
	1	14	5	0	0	0
	2	12	0	0	0	0
	3	4	4	0	0	0
	4	6	0	5	0	3
	5	0	0	15	15	0
	6	9.5	6	14.5	24.5	10
	Cond
	1	0.944444	7.85714	24.2857	40.7143	37.8571
	2	4.58333	28.5714	45.7143	21.4286	23.5714
	3	1.38889	25	36.4286	53.5714	39.2857
	4	5.26587	16.4286	40.7143	34.2857	43.5714
	5	13.7222	11	32.8571	32.8571	37.1429
	6	45.3373	32.1429	43.5714	77.1429	59.2857
	Test
	1	37	64	67	37	59.5
	2	6	41	43	56	31
	3	7	40	36	30	33
	4	43	13	59	45	60.5
	5	30	69	71	50	50.5
	6	49	18	41	79	21.5
Fligth score	Hab	Block1	Block2	Block3	Block4	Block5
	1	0.476674	1.38662	1.53726	1.22176	0.478088
	2	0.920144	0.518039	0.741158	0.70075	0.429078
	3	0.815017	0.882	0.863717	0.909399	1.38095
	4	0.857994	0.704752	0.944806	0.832996	1.04478
	5	0.811206	1.01186	0.866935	1.02672	0.64455
	6	0.618409	1.40451	1.14125	1.3	1.54878
	Cond
	1	2.89824	4.98542	4.90208	2.73535	6.3
	2	2.32551	3.36619	2.63182	3.68468	2.55731
	3	3.72727	6.64031	8.29791	1.90698	6.14815
	4	1.73	1	3.6	8	4.84615
	5	4.90595	5.51984	4.27639	5.36649	6.175
	6	2.72864	3.82015	5.94896	4.95349	5.49715
	Test
	1	1.61591	0.926923	0.366447	0.839161	2.88776
	2	0.969248	1.14562	1.03638	0.67403	1.33333
	3	0.829883	0.990716	1	0.829738	1
	4	0.879845	0.89	0.643968	0.884615	1
	5	1.01852	1	1.14433	0.964286	1
	6	1.09709	1.09709	1	1.69242	0.735043
