# Supplementary material for: Parabrachial CGRP neurons modulate active defensive behavior under a naturalistic threat
Source: eLife. 2025 Jan 10;14:e101523. doi: 10.7554/eLife.101523 (PMC11798572; doi:10.7554/eLife.101523)
Supplement: Figure 1—source data 2. [file elife-101523-fig1-data2.xlsx]

## Sheet: Figure 1E
Session	CGRPl #	Probability	Latency	Correlation			Session	CGRPl #	Probability	Latency	Correlation			Session	CGRPl #	Probability	Latency	Correlation
Hab	1	0.89	1.31217	0.921587			Cond	1	0.84	4.6227	0.86932			Test	1	0.938462	1.28343	0.718451
Hab	2	0.995	3.96016	0.750923			Cond	2	0.88	4.56797	0.888194			Test	2	0.923077	2.51945	0.899403
Hab	3	0.88	3.93371	0.874554			Cond	3	0.833333	5.39631	0.782317			Test	3	0.958333	3.31009	0.871467
Hab	4	0.875	3.09356	0.885817			Cond	4	0.82	4.66981	0.854211			Test	4	0.95	2.84444	0.942578
Hab	5	0.82	2.65725	0.891546			Cond	5	0.891667	4.41115	0.605026			Test	5	0.92	4.08653	0.912431
Hab	6	0.965	1.53737	0.92243			Cond	6	0.830769	4.761	0.891546			Test	6	0.85	4.09	0.717646
Hab	7	0.84	4.14404	0.921403			Cond	7	0.96	2.91506	0.913754			Test	7	0.87	2.27865	0.931617
Hab	8	0.94	3.99083	0.868562			Cond	8	0.98	4.03998	0.794955			Test	8	0.89	2.91506	0.812573
Hab	9	0.835	5.00751	0.821362			Cond	9	0.872727	3.60596	0.889906			Test	9	0.89	3.17595	0.938585
Hab	10	0.88	4.64635	0.930334			Cond	10	0.9	2.6115	0.97175			Test	10	0.936364	2.83957	0.923356
Hab	11	0.86	3.59408	0.887349			Cond	11	1	3.65711	0.821015			Test	11	0.83	4.01819	0.85323
Hab	12	0.815	2.55629	0.718824			Cond	12	0.83	3.6304	0.903809			Test	12	0.89	3.17595	0.938585
Hab	13	0.945	2.59316	0.903809			Cond	13	1	2.39026	0.745132			Test	13	1	1.35326	0.851708
Hab	14	0.825	4.1985	0.808343			Cond	14	0.82	4.78818	0.891555			Test	14	0.93	4.29026	0.836828
Hab	15	0.85	2.38992	0.891555			Cond	15	0.98	3.44026	0.884328			Test	15	0.872727	2.27148	0.714646
Hab	16	0.84	5.47902	0.659818			Cond	16	1	2.77086	0.906477			Test	16	0.875	2.99329	0.793447
Hab	17	0.84	3.50606	0.763645			Cond	17	0.9	4.92246	0.822785			Test	17	0.854545	3.49769	0.659818
Hab	18	0.8	4.82308	0.892726			Cond	18	0.84	5.38193	0.527527			Test	18	0.916667	2.33037	0.911958
Hab	19	0.87	2.98295	0.645305			Cond	19	0.82	4.35194	0.798296			Test	19	0.866667	3.17654	0.786017
Hab	20	0.92	1.88255	0.736855			Cond	20	0.89	3.1824	0.844454			Test	20	0.930769	2.22021	0.849026
Hab	21	1	1.20625	0.900039			Cond	21	0.96	3.50245	0.916036			Test	21	0.875	3.29427	0.793447
Hab	22	0.975	1.5493	0.883866			Cond	22	0.97	3.53578	0.891002			Test	22	0.907692	1.4517	0.892865
Hab	23	0.89	1.41044	0.867517			Cond	23	0.89	3.87687	0.901747			Test	23	0.884615	3.19862	0.823669
Hab	24	0.935	3.1104	0.86341			Cond	24	0.91	2.32217	0.720098			Test	24	0.86	4.21	0.717646
Hab	25	0.892726	4.37292	0.71			Cond	25	0.93	4.16127	0.929228			Test	25	0.87	3.27865	0.931617
Hab	26	0.880931	3.2265	0.69			Cond	26	0.95	4.83957	0.821362			Test	26	0.9	3.77103	0.706765
Hab	27	0.92	3.21971	0.925923			Cond	27	0.85	4.32188	0.866991			Test	27	0.923077	2.94499	0.899403
Hab	28	0.91	2.38776	0.883549			Cond	28	0.91	4.28619	0.923103
							Cond	29	0.86	2.74268	0.836598
Session	Non-CGRPl #	Probability	Latency	Correlation			Session	Non-CGRPl #	Probability	Latency	Correlation			Session	Non-CGRPl #	Probability	Latency	Correlation
Hab	1	0.692308	8.13519	0.874554			Cond	1	0.392308	8.20958	0.683582			Test	1	0.25	9.1999	0.520173
Hab	2	0.41	5.15975	0.228572			Cond	2	0.630769	12.4409	0.752935			Test	2	0.51	7.56032	0.450339
Hab	3	0.42	10.1097	0.343128			Cond	3	0.333333	12.8767	0.533997			Test	3	0.26	9.35547	0.491413
Hab	4	0.13	21.9675	0.674089			Cond	4	0.7	11.1802	0.787583			Test	4	0.12	8.51152	0.331946
Hab	5	0.125	13.6247	0.639135			Cond	5	0.21	7.0632	0.545925			Test	5	0.42	13.339	0.154768
Hab	6	0.4	8.652	0.513306			Cond	6	0.43	4.4249	0.321686			Test	6	0.272727	3.37646	0.447988
Hab	7	0.47	20.4786	0.428154			Cond	7	0.336364	18.7617	0.329585			Test	7	0.16	9.3759	0.289447
Hab	8	0.125	16.2798	0.598279			Cond	8	0.24	12.1798	0.606218			Test	8	0.181818	13.8464	0.50188
Hab	9	0.33	16.659	0.383821			Cond	9	0.25	14.7595	0.658481			Test	9	0.316667	6.57543	0.575564
Hab	10	0.28	13.8775	0.404303			Cond	10	0.0909091	14.4089	0.241648			Test	10	0.075	4.40693	0.143938
Hab	11	0.22	11.523	0.364256			Cond	11	0.48	6.74896	0.718824			Test	11	0.233333	5.53711	0.455081
Hab	12	0.32	10.856	0.565369			Cond	12	0.07	18.7617	0.81242			Test	12	0.25	8.34272	0.209264
Hab	13	0.265	15.542	0.354273			Cond	13	0.52	8.58313	0.487125			Test	13	0.363636	8.51152	0.381983
Hab	14	0.325	13.2253	0.658023			Cond	14	0.185	9.9538	0.644357			Test	14	0.0636364	10.5932	0.170485
Hab	15	0.19	12.279	0.47564			Cond	15	0.2	7.74039	0.479553			Test	15	0.41	13.1565	0.585761
Hab	16	0.61	10.848	0.833908			Cond	16	0.34	8.83125	0.110067			Test	16	0.592308	9.134	0.647168
Hab	17	0.325	17.636	0.57162			Cond	17	0.27	8.33558	0.306566			Test	17	0.416667	10.1635	0.548309
Hab	18	0.09	17.5096	0.472421			Cond	18	0.736364	8.80518	0.760713			Test	18	0.675	7.2947	0.86877
Hab	19	0.455	4.69773	0.428632			Cond	19	0.290909	8.33558	0.666287			Test	19	0.225	13.4872	0.191743
Hab	20	0.29	11.153	0.119401			Cond	20	0.454545	11.3558	0.428632			Test	20	0.358333	10.3709	0.410427
Hab	21	0.505	7.34822	0.0811289			Cond	21	0.306934	6.30693	0.240253			Test	21	0.285	7.51978	0.429913
Hab	22	0.475	13.9047	0.535731			Cond	22	0.665	4.31462	0.2639			Test	22	0.125	11.6247	0.639135
Hab	23	0.54	9.62111	0.228445			Cond	23	0.17	12.7363	0.253194			Test	23	0.495	12.1823	0.757944
Hab	24	0.515	8.05494	0.595494			Cond	24	0.249232	13.6347	0.472383			Test	24	0.41	12.0002	0.537556
Hab	25	0.14	4.937	0.193644			Cond	25	0.43	14.1336	0.494584			Test	25	0.0384615	24.7069	0.282547
Hab	26	0.355	1.59625	0.216994			Cond	26	0.21	11.599	0.628545			Test	26	0.55	6.7581	0.67673
Hab	27	0.24	3.944	0.730943			Cond	27	0.17	18.249	0.595494			Test	27	0.285714	7.42188	0.429643
Hab	28	0.28	5.47086	0.787884			Cond	28	0.26	5.19897	0.47485			Test	28	0.285714	4.02142	0.259824
Hab	29	0.22	2.3395	0.802872			Cond	29	0.12	6.38193	0.803347
Hab	30	0.135	6.8328	0.69185			Cond	30	0.16	3.11895	0.644763
Hab	31	0.195	6.2868	0.533508			Cond	31	0.12	13.3901	0.297394
Hab	32	0.38	5.83033	0.623384			Cond	32	0.265	21.6935	0.640117
Hab	33	0.35	2.18417	0.244377			Cond	33	0.26	5.94576	0.616069
							Cond	34	0.364893	8.28711	0.50171
							Cond	35	0.6	6.50625	0.576877
							Cond	36	0.45	8.69407	0.287493
							Cond	37	0.23	16.4492	0.207329
							Cond	38	0.13	12.5024	0.560557

## Sheet: Figure 1F
Hab	Time
# cells	-5000	-4950	-4900	-4850	-4800	-4750	-4700	-4650	-4600	-4550	-4500	-4450	-4400	-4350	-4300	-4250	-4200	-4150	-4100	-4050	-4000	-3950	-3900	-3850	-3800	-3750	-3700	-3650	-3600	-3550	-3500	-3450	-3400	-3350	-3300	-3250	-3200	-3150	-3100	-3050	-3000	-2950	-2900	-2850	-2800	-2750	-2700	-2650	-2600
1	8	9.77778	15.1111	19.5556	9.77778	8	13.3333	11.5556	8.88889	11.5556	8.88889	12.4444	10.6667	9.77778	12.4444	7.11111	9.77778	15.1111	11.5556	11.5556	6.22222	9.77778	8.88889	8.88889	10.6667	8.88889	15.1111	11.5556	8.88889	11.5556	9.77778	13.3333	13.3333	12.4444	12.4444	3.55556	15.1111	8.88889	16	11.5556	13.3333	15.1111	8.88889	15.1111	13.3333	7.11111	13.3333	9.77778	10.6667
2	17.1111	10.8889	10.8889	10.8889	12.4444	9.33333	10.8889	10.8889	14	21.7778	10.8889	9.33333	12.4444	6.22222	14	18.6667	6.22222	9.33333	10.8889	17.1111	12.4444	12.4444	7.77778	6.22222	12.4444	7.77778	14	14	20.2222	9.33333	12.4444	15.5556	7.77778	4.66667	9.33333	9.33333	7.77778	17.1111	9.33333	14	12.4444	18.6667	10.8889	17.1111	14	7.77778	14	9.33333	14
3	14.2222	5.33333	8.88889	17.7778	5.33333	14.2222	17.7778	14.2222	7.11111	7.11111	5.33333	7.11111	17.7778	7.11111	12.4444	14.2222	16	14.2222	17.7778	10.6667	12.4444	12.4444	10.6667	16	8.88889	17.7778	10.6667	12.4444	14.2222	7.11111	8.88889	12.4444	16	14.2222	10.6667	8.88889	10.6667	17.7778	8.88889	10.6667	10.6667	14.2222	16	12.4444	8.88889	10.6667	14.2222	8.88889	16
4	11.1111	13.3333	8.88889	26.6667	15.5556	15.5556	28.8889	22.2222	8.88889	13.3333	17.7778	13.3333	15.5556	22.2222	24.4444	11.1111	11.1111	17.7778	13.3333	11.1111	24.4444	24.4444	4.44444	17.7778	26.6667	11.1111	26.6667	17.7778	22.2222	8.88889	13.3333	11.1111	8.88889	35.5556	17.7778	13.3333	15.5556	22.2222	28.8889	17.7778	17.7778	22.2222	15.5556	20	11.1111	20	24.4444	4.44444	28.8889
5	6	12	12	18	10	14	14	14	18	16	10	20	14	8	18	12	6	8	12	6	10	10	4	16	14	16	10	14	14	14	18	16	20	18	14	12	16	12	16	16	10	12	24	20	12	18	10	8	10
6	14.2857	10	11.4286	20	10	12.8571	14.2857	17.1429	15.7143	12.8571	21.4286	17.1429	25.7143	18.5714	14.2857	15.7143	18.5714	10	15.7143	24.2857	17.1429	21.4286	17.1429	15.7143	14.2857	15.7143	17.1429	18.5714	15.7143	27.1429	11.4286	18.5714	21.4286	22.8571	20	12.8571	24.2857	17.1429	14.2857	14.2857	17.1429	18.5714	28.5714	22.8571	18.5714	17.1429	17.1429	11.4286	25.7143
7	16.5	4.5	15	21	10.5	4.5	24	12	18	10.5	9	12	12	9	7.5	7.5	9	10.5	0	10.5	7.5	10.5	15	12	6	12	10.5	12	9	10.5	9	13.5	13.5	15	16.5	16.5	3	16.5	13.5	12	12	24	7.5	13.5	7.5	6	10.5	12	10.5
8	20	22.5	15	17.5	12.5	12.5	25	22.5	25	15	25	12.5	27.5	27.5	15	30	22.5	30	10	20	25	22.5	17.5	27.5	20	30	12.5	12.5	7.5	10	10	10	12.5	12.5	10	17.5	25	22.5	25	15	15	15	12.5	17.5	12.5	17.5	12.5	20	17.5
9	4.28571	2.85714	0	5.71429	11.4286	2.85714	5.71429	1.42857	2.85714	7.14286	10	14.2857	10	4.28571	8.57143	5.71429	4.28571	8.57143	5.71429	8.57143	0	8.57143	7.14286	0	4.28571	7.14286	10	4.28571	5.71429	0	8.57143	5.71429	8.57143	7.14286	14.2857	4.28571	8.57143	1.42857	5.71429	4.28571	11.4286	5.71429	11.4286	7.14286	7.14286	8.57143	8.57143	1.42857	12.8571
10	0	2.85714	0	2.85714	2.85714	2.85714	8.57143	2.85714	0	2.85714	17.1429	17.1429	5.71429	14.2857	2.85714	5.71429	5.71429	8.57143	8.57143	0	0	8.57143	0	2.85714	8.57143	11.4286	2.85714	5.71429	2.85714	8.57143	8.57143	11.4286	14.2857	2.85714	11.4286	14.2857	8.57143	2.85714	5.71429	11.4286	11.4286	8.57143	5.71429	14.2857	2.85714	8.57143	17.1429	5.71429	14.2857
11	5.71429	2.85714	2.85714	0	0	8.57143	5.71429	5.71429	11.4286	14.2857	8.57143	11.4286	8.57143	11.4286	14.2857	2.85714	14.2857	8.57143	8.57143	2.85714	5.71429	11.4286	5.71429	0	8.57143	11.4286	11.4286	14.2857	8.57143	2.85714	8.57143	5.71429	14.2857	5.71429	17.1429	5.71429	8.57143	8.57143	8.57143	0	5.71429	8.57143	11.4286	0	8.57143	2.85714	22.8571	5.71429	14.2857
12	0	2.85714	11.4286	11.4286	5.71429	2.85714	11.4286	5.71429	2.85714	2.85714	14.2857	8.57143	11.4286	11.4286	2.85714	8.57143	0	0	5.71429	2.85714	8.57143	8.57143	2.85714	2.85714	14.2857	11.4286	14.2857	14.2857	11.4286	8.57143	0	0	11.4286	14.2857	8.57143	5.71429	5.71429	5.71429	8.57143	2.85714	11.4286	8.57143	14.2857	2.85714	2.85714	5.71429	20	11.4286	11.4286
13	15	7.5	5	2.5	0	10	15	10	2.5	5	2.5	5	7.5	7.5	2.5	5	10	10	17.5	12.5	5	7.5	5	17.5	7.5	7.5	20	15	12.5	5	7.5	17.5	5	10	5	5	2.5	5	0	0	2.5	5	7.5	15	5	12.5	7.5	7.5	12.5
14	5	5	7.5	2.5	2.5	5	0	5	2.5	2.5	2.5	0	5	2.5	5	2.5	2.5	5	7.5	2.5	2.5	5	5	22.5	5	7.5	10	12.5	5	2.5	2.5	10	17.5	0	2.5	0	5	2.5	5	0	5	5	5	10	17.5	2.5	7.5	7.5	5
15	24	18	24	12	18	18	16	20	20	22	20	28	22	22	8	40	16	26	24	12	30	18	12	24	18	22	24	20	22	18	20	32	14	10	26	24	16	12	34	20	32	16	30	30	24	32	22	12	20
16	18.2857	11.4286	11.4286	9.14286	13.7143	20.5714	18.2857	11.4286	6.85714	20.5714	11.4286	20.5714	16	27.4286	36.5714	13.7143	20.5714	29.7143	11.4286	27.4286	13.7143	13.7143	2.28571	6.85714	6.85714	11.4286	16	0	9.14286	6.85714	4.57143	2.28571	16	2.28571	6.85714	2.28571	9.14286	2.28571	9.14286	2.28571	6.85714	4.57143	11.4286	9.14286	2.28571	22.8571	18.2857	20.5714	6.85714
17	6	2	10	8	8	10	0	10	8	4	2	8	8	32	18	8	2	10	4	6	6	8	0	8	6	6	8	10	4	8	8	18	20	14	18	14	10	8	8	22	12	6	6	20	0	12	16	14	2
18	2.5	0	12.5	7.5	2.5	5	7.5	22.5	0	2.5	10	10	2.5	10	5	7.5	12.5	2.5	7.5	12.5	15	7.5	0	15	10	5	10	7.5	2.5	10	7.5	10	7.5	5	2.5	7.5	10	2.5	0	10	7.5	2.5	7.5	0	2.5	7.5	5	5	2.5
19	10	5	2.5	10	10	2.5	2.5	5	2.5	7.5	10	0	5	7.5	2.5	5	5	5	5	7.5	5	2.5	7.5	0	5	10	5	2.5	2.5	7.5	5	12.5	2.5	7.5	2.5	7.5	7.5	0	5	7.5	2.5	2.5	10	5	10	5	7.5	5	2.5
20	2.5	2.5	5	0	5	10	2.5	2.5	5	15	2.5	2.5	2.5	7.5	5	5	10	10	10	15	22.5	30	15	5	7.5	7.5	12.5	5	17.5	17.5	15	10	7.5	10	17.5	7.5	20	12.5	15	7.5	15	7.5	7.5	2.5	2.5	7.5	10	7.5	7.5
21	10	15	17.5	15	17.5	17.5	17.5	17.5	12.5	15	5	15	10	17.5	10	17.5	17.5	5	10	7.5	10	17.5	10	12.5	17.5	10	15	12.5	17.5	17.5	15	10	7.5	12.5	7.5	5	10	5	15	12.5	7.5	17.5	17.5	20	12.5	10	12.5	15	7.5
22	15	12.5	5	5	10	25	7.5	10	7.5	10	5	10	5	5	7.5	10	10	15	7.5	0	5	12.5	7.5	12.5	5	5	12.5	5	10	10	15	7.5	5	5	7.5	0	10	12.5	2.5	10	7.5	5	2.5	15	2.5	10	25	10	5
23	5	5	7.5	7.5	15	5	0	12.5	7.5	7.5	5	0	2.5	15	5	12.5	7.5	2.5	10	0	0	5	5	2.5	0	0	0	0	0	7.5	2.5	2.5	2.5	5	0	5	2.5	12.5	2.5	2.5	5	10	7.5	2.5	2.5	2.5	5	5	7.5
24	5.71429	0	0	2.85714	5.71429	2.85714	8.57143	5.71429	0	0	5.71429	2.85714	0	2.85714	2.85714	0	2.85714	2.85714	0	11.4286	11.4286	0	5.71429	5.71429	5.71429	0	0	2.85714	5.71429	8.57143	0	5.71429	2.85714	0	2.85714	5.71429	2.85714	2.85714	0	0	2.85714	0	2.85714	2.85714	0	0	8.57143	2.85714	0
25	31.4286	37.1429	25.7143	20	28.5714	5.71429	22.8571	14.2857	28.5714	11.4286	20	14.2857	25.7143	8.57143	20	28.5714	17.1429	5.71429	22.8571	28.5714	28.5714	14.2857	14.2857	8.57143	14.2857	28.5714	25.7143	22.8571	14.2857	22.8571	20	20	14.2857	14.2857	20	20	11.4286	8.57143	8.57143	20	25.7143	11.4286	28.5714	14.2857	11.4286	25.7143	8.57143	34.2857	14.2857
26	4.5	4.5	18	11.25	15.75	15.75	9	20.25	22.5	13.5	13.5	11.25	22.5	9	18	11.25	13.5	20.25	11.25	22.5	11.25	13.5	18	18	15.75	18	9	15.75	13.5	13.5	22.5	18	13.5	11.25	9	22.5	18	6.75	9	9	20.25	9	9	11.25	18	9	13.5	15.75	11.25
27	18	10	14	22	24	22	18	10	14	14	18	6	14	14	12	18	18	14	10	20	8	14	4	16	20	6	6	10	14	6	8	6	8	10	6	12	22	16	14	12	16	14	14	8	14	16	12	10	16
28	5	12.5	2.5	5	22.5	10	0	2.5	2.5	10	5	2.5	5	7.5	2.5	17.5	5	7.5	12.5	5	15	7.5	10	5	7.5	10	15	7.5	2.5	5	0	7.5	5	12.5	10	7.5	2.5	20	15	17.5	5	7.5	5	7.5	5	10	22.5	15	10
Cond	Time
# cells	-5000	-4950	-4900	-4850	-4800	-4750	-4700	-4650	-4600	-4550	-4500	-4450	-4400	-4350	-4300	-4250	-4200	-4150	-4100	-4050	-4000	-3950	-3900	-3850	-3800	-3750	-3700	-3650	-3600	-3550	-3500	-3450	-3400	-3350	-3300	-3250	-3200	-3150	-3100	-3050	-3000	-2950	-2900	-2850	-2800	-2750	-2700	-2650	-2600
1	8	14	19	14	17	8	5	12	16	12	9	11	13	7	11	9	8	8	22	17	16	15	13	14	16	17	11	12	19	15	24	16	11	18	23	12	10	2	5	9	7	3	10	8	8	7	10	11	20
2	12.25	7	12.25	19.25	15.75	17.5	14	24.5	19.25	19.25	17.5	26.25	12.25	17.5	26.25	10.5	8.75	12.25	17.5	12.25	10.5	17.5	15.75	17.5	17.5	10.5	24.5	14	15.75	14	15.75	8.75	24.5	24.5	17.5	10.5	15.75	22.75	7	17.5	22.75	14	17.5	14	10.5	17.5	19.25	12.25	7
3	12	10	8	12	16	8	12	8	22	12	10	10	8	8	16	10	16	10	18	10	6	16	24	18	26	14	8	14	16	6	14	12	4	10	18	10	16	10	10	6	10	10	12	8	14	4	8	12	20
4	12.5	10	20	10	22.5	10	27.5	17.5	27.5	10	15	17.5	12.5	7.5	12.5	10	17.5	27.5	12.5	12.5	25	22.5	10	25	10	17.5	2.5	10	7.5	20	12.5	10	20	7.5	22.5	15	5	2.5	17.5	15	5	7.5	10	20	5	15	5	17.5	12.5
5	13.7143	20.5714	17.1429	15.4286	13.7143	24	17.1429	18.8571	17.1429	13.7143	17.1429	8.57143	18.8571	12	15.4286	17.1429	13.7143	17.1429	17.1429	34.2857	22.2857	15.4286	20.5714	20.5714	29.1429	18.8571	17.1429	18.8571	17.1429	15.4286	22.2857	13.7143	25.7143	15.4286	22.2857	20.5714	30.8571	24	27.4286	13.7143	27.4286	27.4286	27.4286	18.8571	22.2857	20.5714	20.5714	18.8571	25.7143
6	18	14	12	18	12	30	12	8	4	14	16	12	12	14	14	6	10	8	12	16	16	22	8	8	14	12	14	8	16	2	14	8	14	14	14	14	14	16	18	18	14	6	20	22	10	12	14	6	18
7	15.7143	12.8571	8.57143	11.4286	18.5714	15.7143	18.5714	4.28571	14.2857	22.8571	12.8571	15.7143	17.1429	12.8571	21.4286	15.7143	18.5714	22.8571	20	20	17.1429	11.4286	11.4286	8.57143	11.4286	22.8571	18.5714	15.7143	12.8571	15.7143	28.5714	11.4286	21.4286	11.4286	11.4286	17.1429	30	18.5714	11.4286	10	18.5714	14.2857	21.4286	12.8571	10	14.2857	20	18.5714	20
8	7.5	10	2.5	15	12.5	15	5	7.5	5	7.5	10	12.5	12.5	12.5	7.5	15	15	0	7.5	10	17.5	22.5	10	10	15	12.5	15	17.5	5	22.5	5	10	12.5	10	5	12.5	5	10	10	5	15	7.5	20	12.5	10	15	15	12.5	5
9	5	5	12.5	10	7.5	17.5	10	12.5	7.5	10	2.5	5	10	2.5	7.5	5	7.5	15	7.5	5	5	5	2.5	10	2.5	2.5	5	7.5	10	12.5	7.5	5	12.5	10	12.5	2.5	12.5	7.5	15	12.5	15	15	7.5	27.5	22.5	12.5	7.5	12.5	7.5
10	8.75	15	11.25	7.5	5	6.25	13.75	8.75	8.75	11.25	8.75	13.75	7.5	8.75	8.75	17.5	16.25	3.75	10	10	2.5	5	12.5	16.25	10	12.5	5	10	7.5	8.75	13.75	3.75	6.25	11.25	15	21.25	15	16.25	17.5	11.25	5	10	17.5	18.75	22.5	13.75	13.75	10	10
11	10	15	10	10	12.5	7.5	7.5	12.5	10	15	20	12.5	12.5	10	17.5	40	22.5	10	15	17.5	2.5	5	12.5	10	15	22.5	2.5	0	15	17.5	15	5	10	7.5	20	30	32.5	27.5	25	15	15	12.5	20	27.5	20	10	2.5	5	20
12	10	15	7.5	5	7.5	10	10	10	12.5	10	5	15	5	15	17.5	10	32.5	7.5	12.5	17.5	5	2.5	20	5	7.5	12.5	5	5	10	5	2.5	17.5	12.5	20	10	25	12.5	12.5	12.5	17.5	5	5	25	12.5	25	17.5	15	5	7.5
13	8	4.57143	1.14286	5.71429	18.2857	21.7143	8	16	16	11.4286	11.4286	12.5714	11.4286	13.7143	27.4286	21.7143	10.2857	9.14286	17.1429	11.4286	12.5714	8	4.57143	6.85714	6.85714	6.85714	9.14286	3.42857	8	9.14286	2.28571	6.85714	2.28571	8	8	11.4286	10.2857	12.5714	12.5714	11.4286	18.2857	22.8571	12.5714	11.4286	12.5714	6.85714	14.8571	12.5714	9.14286
14	10.2857	8.57143	5.14286	3.42857	6.85714	8.57143	3.42857	22.2857	10.2857	15.4286	10.2857	15.4286	10.2857	20.5714	17.1429	20.5714	13.7143	17.1429	13.7143	8.57143	8.57143	17.1429	12	10.2857	6.85714	8.57143	0	3.42857	6.85714	6.85714	15.4286	8.57143	5.14286	6.85714	6.85714	5.14286	1.71429	0	8.57143	13.7143	17.1429	12	15.4286	12	5.14286	6.85714	10.2857	17.1429	15.4286
15	11.4286	13.7143	20.5714	2.28571	18.2857	13.7143	32	22.8571	22.8571	25.1429	9.14286	29.7143	18.2857	11.4286	48	34.2857	16	22.8571	18.2857	13.7143	13.7143	6.85714	13.7143	11.4286	16	18.2857	18.2857	2.28571	22.8571	9.14286	13.7143	25.1429	18.2857	13.7143	9.14286	9.14286	18.2857	13.7143	9.14286	32	43.4286	18.2857	18.2857	6.85714	9.14286	25.1429	16	11.4286	13.7143
16	34	38	20	20	18	12	8	2	30	26	34	22	18	20	22	8	18	16	14	16	12	20	28	14	12	14	10	14	10	10	3.2	4.8	12.8	6.4	25.6	17.6	32	12.8	25.6	27.2	12.8	30.4	16	44.8	22.4	40	30.4	9.6	4
17	6.85714	16	20.5714	0	6.85714	9.14286	0	25.1429	20.5714	6.85714	0	4.57143	9.14286	16	16	13.7143	2.28571	9.14286	6.85714	2.28571	2.28571	0	2.28571	2.28571	2.28571	2.28571	18.2857	16	9.14286	20.5714	6.85714	6.85714	2.28571	2.28571	2.28571	13.7143	4.57143	2.28571	0	13.7143	11.4286	6.85714	9.14286	6.85714	2.28571	9.14286	2.28571	4.57143	2.28571
18	8.57143	8.57143	17.1429	5.71429	8.57143	5.71429	11.4286	2.85714	8.57143	17.1429	11.4286	11.4286	2.85714	8.57143	22.8571	8.57143	8.57143	8.57143	5.71429	8.57143	5.71429	11.4286	0	5.71429	0	0	8.57143	8.57143	5.71429	8.57143	8.57143	8.57143	5.71429	2.85714	11.4286	11.4286	5.71429	20	0	8.57143	8.57143	8.57143	2.85714	25.7143	11.4286	5.71429	5.71429	2.85714	2.85714
19	0	5.71429	17.1429	8.57143	14.2857	2.85714	2.85714	8.57143	0	11.4286	2.85714	0	0	2.85714	14.2857	5.71429	11.4286	11.4286	8.57143	14.2857	5.71429	0	5.71429	8.57143	5.71429	2.85714	5.71429	8.57143	8.57143	11.4286	5.71429	5.71429	11.4286	8.57143	2.85714	5.71429	5.71429	5.71429	8.57143	2.85714	11.4286	31.4286	5.71429	8.57143	11.4286	0	8.57143	5.71429	11.4286
20	5	2.5	15	15	0	0	2.5	2.5	7.5	10	7.5	0	2.5	7.5	0	0	2.5	2.5	2.5	0	2.5	0	0	2.5	2.5	5	5	12.5	10	2.5	12.5	5	0	5	2.5	2.5	2.5	12.5	2.5	7.5	22.5	15	0	10	2.5	12.5	5	2.5	0
21	17.5	22.5	25	35	27.5	10	12.5	30	20	2.5	12.5	20	17.5	5	15	32.5	15	7.5	12.5	32.5	10	22.5	7.5	7.5	15	12.5	17.5	15	35	22.5	42.5	35	25	27.5	12.5	17.5	27.5	30	27.5	22.5	17.5	20	35	20	20	25	12.5	12.5	32.5
22	12.5	12.5	10	17.5	10	5	7.5	10	7.5	5	15	15	7.5	10	12.5	25	17.5	5	7.5	12.5	5	5	5	10	10	10	12.5	10	10	5	17.5	17.5	5	12.5	10	12.5	7.5	7.5	7.5	12.5	5	10	15	7.5	5	15	10	10	7.5
23	4.5	4.5	6.75	13.5	18	2.25	13.5	9	4.5	6.75	2.25	18	0	4.5	13.5	4.5	9	4.5	4.5	6.75	9	15.75	20.25	2.25	11.25	2.25	13.5	0	13.5	4.5	20.25	11.25	9	9	4.5	9	9	6.75	2.25	4.5	9	9	11.25	4.5	9	13.5	6.75	9	2.25
24	2.5	2.5	2.5	0	0	2.5	2.5	5	10	2.5	2.5	2.5	7.5	2.5	0	0	7.5	0	2.5	7.5	0	2.5	2.5	0	2.5	2.5	7.5	0	5	5	5	0	5	7.5	10	0	5	5	2.5	7.5	2.5	5	2.5	2.5	12.5	5	2.5	0	0
25	5	22.5	25	25	15	7.5	5	20	12.5	22.5	20	20	25	15	7.5	15	20	22.5	15	10	25	15	27.5	25	20	10	15	17.5	10	22.5	15	15	20	15	17.5	17.5	22.5	22.5	12.5	20	15	20	17.5	20	20	12.5	22.5	20	7.5
26	32	22.8571	4.57143	16	20.5714	13.7143	16	34.2857	20.5714	22.8571	16	29.7143	18.2857	16	20.5714	18.2857	32	22.8571	16	11.4286	20.5714	22.8571	13.7143	32	20.5714	11.4286	11.4286	25.1429	16	27.4286	29.7143	25.1429	11.4286	27.4286	22.8571	29.7143	25.1429	11.4286	13.7143	20.5714	25.1429	18.2857	25.1429	20.5714	25.1429	22.8571	25.1429	20.5714	13.7143
27	17.1429	20.5714	17.1429	12	18.8571	30.8571	20.5714	18.8571	22.2857	22.2857	10.2857	17.1429	8.57143	10.2857	17.1429	29.1429	18.8571	12	17.1429	15.4286	13.7143	18.8571	13.7143	15.4286	12	17.1429	22.2857	12	20.5714	25.7143	24	20.5714	13.7143	17.1429	17.1429	32.5714	25.7143	8.57143	12	13.7143	17.1429	18.8571	17.1429	17.1429	22.2857	36	17.1429	27.4286	20.5714
28	32.5	12.5	12.5	17.5	17.5	15	5	12.5	17.5	22.5	10	20	27.5	5	25	7.5	15	35	17.5	35	20	10	20	7.5	30	27.5	17.5	15	15	7.5	7.5	15	12.5	5	17.5	17.5	10	20	7.5	25	22.5	17.5	22.5	22.5	10	12.5	12.5	12.5	30
29	8.75	10	11.25	10	15	3.75	8.75	8.75	7.5	7.5	8.75	12.5	12.5	8.75	8.75	7.5	1.25	11.25	3.75	3.75	7.5	8.75	7.5	6.25	3.75	12.5	8.75	8.75	7.5	7.5	13.75	7.5	6.25	7.5	12.5	13.75	8.75	7.5	8.75	8.75	11.25	5	6.25	6.25	6.25	5	10	2.5	10
Test	Time
# cells	-5000	-4950	-4900	-4850	-4800	-4750	-4700	-4650	-4600	-4550	-4500	-4450	-4400	-4350	-4300	-4250	-4200	-4150	-4100	-4050	-4000	-3950	-3900	-3850	-3800	-3750	-3700	-3650	-3600	-3550	-3500	-3450	-3400	-3350	-3300	-3250	-3200	-3150	-3100	-3050	-3000	-2950	-2900	-2850	-2800	-2750	-2700	-2650	-2600
1	12.5714	8	8	3.42857	11.4286	3.42857	3.42857	6.85714	5.71429	6.85714	5.71429	8	5.71429	5.71429	3.42857	1.14286	5.71429	8	12.5714	14.8571	10.2857	6.85714	8	12.5714	9.14286	13.7143	16	8	17.1429	12.5714	13.7143	12.5714	21.7143	14.8571	12.5714	10.2857	10.2857	8	17.1429	12.5714	8	9.14286	12.5714	13.7143	12.5714	14.8571	6.85714	5.71429	6.85714
2	14	6	14	4	6	8	4	16	18	8	2	10	8	6	6	10	16	8	12	12	8	8	14	8	12	8	14	12	16	20	12	10	24	12	24	14	20	12	8	16	18	18	4	12	8	12	8	12	16
3	6.85714	9.14286	11.4286	13.7143	16	9.14286	4.57143	11.4286	6.85714	6.85714	9.14286	9.14286	2.28571	9.14286	2.28571	11.4286	9.14286	2.28571	18.2857	4.57143	4.57143	16	4.57143	6.85714	9.14286	2.28571	13.7143	9.14286	11.4286	9.14286	18.2857	6.85714	9.14286	13.7143	11.4286	9.14286	4.57143	6.85714	6.85714	6.85714	6.85714	0	6.85714	16	18.2857	13.7143	9.14286	20.5714	4.57143
4	5.71429	14.2857	11.4286	5.71429	22.8571	0	2.85714	8.57143	22.8571	8.57143	8.57143	22.8571	11.4286	8.57143	5.71429	5.71429	5.71429	8.57143	5.71429	20	14.2857	2.85714	8.57143	20	11.4286	8.57143	8.57143	14.2857	31.4286	20	17.1429	20	14.2857	11.4286	11.4286	11.4286	8.57143	8.57143	8.57143	14.2857	22.8571	14.2857	5.71429	11.4286	37.1429	8.57143	11.4286	0	8.57143
5	21	21	25.5	15	13.5	16.5	30	28.5	16.5	18	15	15	15	18	19.5	18	16.5	16.5	34.5	18	19.5	16.5	16.5	19.5	15	15	27	28.5	21	15	22.5	9	18	10.5	22.5	15	10.5	15	13.5	13.5	22.5	30	18	21	18	31.5	12	22.5	21
6	12.25	21	22.75	26.25	15.75	15.75	22.75	19.25	12.25	24.5	15.75	15.75	12.25	7	12.25	12.25	21	14	8.75	15.75	10.5	15.75	17.5	28	21	7	21	15.75	14	8.75	5.25	8.75	14	24.5	10.5	17.5	8.75	15.75	19.25	14	15.75	21	12.25	12.25	14	24.5	15.75	22.75	15.75
7	15	13.75	20	16.25	16.25	15	15	21.25	25	12.5	12.5	25	11.25	11.25	15	15	18.75	13.75	13.75	16.25	17.5	17.5	8.75	21.25	17.5	10	13.75	25	23.75	15	16.25	8.75	17.5	15	16.25	17.5	17.5	16.25	7.5	15	11.25	22.5	16.25	16.25	15	16.25	17.5	18.75	11.25
8	10.8	21.6	16.2	23.4	27	18	9	14.4	12.6	7.2	14.4	19.8	27	7.2	21.6	19.8	21.6	18	19.8	16.2	25.2	12.6	14.4	10.8	16.2	19.8	18	16.2	7.2	12.6	14.4	12.6	14.4	12.6	21.6	12.6	14.4	18	28.8	25.2	7.2	14.4	18	12.6	23.4	9	23.4	36	21.6
9	15	12.5	7.5	7.5	17.5	15	15	15	15	15	30	7.5	10	10	12.5	5	22.5	17.5	7.5	2.5	12.5	12.5	5	10	15	15	10	12.5	17.5	17.5	5	10	7.5	7.5	7.5	15	15	7.5	5	12.5	17.5	10	17.5	7.5	25	15	5	7.5	2.5
10	2.5	10	10	7.5	6.75	6.75	6.75	0	9	4.5	2.25	6.75	6.75	2.25	9	4.5	4.5	9	15.75	9	0	2.25	9	6.75	0	4.5	4.5	4.5	9	6.75	6.75	9	11.25	11.25	6.75	9	9	9	4.5	9	2.25	6.75	11.25	4.5	6.75	11.25	4.5	2.25	13.5
11	10	7.5	3.75	3.75	7.5	3.75	3.75	7.5	10	10	8.75	5	6.25	3.75	1.25	7.5	6.25	0	2.5	3.75	8.75	3.75	7.5	8.75	6.25	10	5	6.25	6.25	11.25	5	2.5	10	7.5	7.5	2.5	5	2.5	3.75	5	2.5	15	1.25	7.5	6.25	6.25	6.25	5	5
12	10	12.5	5	7.5	17.5	0	12.5	20	15	7.5	15	2.5	7.5	22.5	7.5	2.5	10	7.5	2.5	0	22.5	7.5	5	10	22.5	5	20	20	10	20	5	10	7.5	10	10	2.5	25	2.5	12.5	10	2.5	0	12.5	7.5	22.5	7.5	12.5	20	17.5
13	15	22.5	2.5	15	25	12.5	10	30	10	22.5	27.5	7.5	15	17.5	12.5	10	22.5	12.5	20	20	12.5	15	7.5	22.5	15	25	15	10	15	30	22.5	15	35	20	17.5	20	5	22.5	20	10	10	15	7.5	20	17.5	22.5	20	20	22.5
14	7.71429	23.1429	10.2857	12.8571	33.4286	23.1429	10.2857	5.14286	12.8571	15.4286	10.2857	15.4286	36	5.14286	15.4286	20.5714	5.14286	10.2857	7.71429	15.4286	12.8571	10.2857	20.5714	5.14286	25.7143	7.71429	18	12.8571	12.8571	5.14286	10.2857	18	20.5714	7.71429	15.4286	20.5714	15.4286	18	10.2857	10.2857	15.4286	18	12.8571	18	5.14286	12.8571	12.8571	18	10.2857
15	20	10	11.4286	8.57143	12.8571	20	11.4286	7.14286	12.8571	7.14286	7.14286	20	30	11.4286	10	5.71429	11.4286	14.2857	14.2857	12.8571	7.14286	11.4286	21.4286	12.8571	14.2857	14.2857	11.4286	8.57143	11.4286	14.2857	7.14286	14.2857	8.57143	7.14286	11.4286	11.4286	14.2857	11.4286	2.85714	5.71429	10	7.14286	11.4286	8.57143	14.2857	5.71429	7.14286	5.71429	7.14286
16	12	18.8571	12	5.14286	25.7143	8.57143	6.85714	10.2857	5.14286	3.42857	5.14286	15.4286	18.8571	8.57143	3.42857	8.57143	6.85714	8.57143	8.57143	6.85714	3.42857	12	8.57143	5.14286	10.2857	6.85714	8.57143	3.42857	10.2857	8.57143	10.2857	1.71429	8.57143	12	6.85714	6.85714	6.85714	6.85714	6.85714	6.85714	12	5.14286	1.71429	3.42857	5.14286	12	6.85714	1.71429	6.85714
17	22.6286	32.9143	30.8571	16.4571	26.7429	41.1429	26.7429	22.6286	26.7429	18.5143	22.6286	24.6857	18.5143	12.3429	14.4	14.4	22.6286	18.5143	16.4571	18.5143	26.7429	16.4571	22.6286	14.4	26.7429	28.8	6.17143	18.5143	24.6857	22.6286	14.4	20.5714	16.4571	10.2857	14.4	20.5714	12.3429	18.5143	14.4	12.3429	16.4571	22.6286	16.4571	16.4571	30.8571	10.2857	16.4571	24.6857	28.8
18	10	10	12	26	16	14	8	10	6	14	16	22	12	12	16	14	14	10	10	10	16	14	22	14	14	10	14	16	22	6	14	16	12	14	12	12	14	18	8	14	10	12	30	10	8	10	10	26	22
19	8	42	28	18	24	12	14	4	10	6	12	4	4	6	10	4	12	20	12	8	20	10	16	6	6	22	10	16	12	20	6	18	18	6	10	4	14	12	18	6	8	16	14	16	10	14	22	14	10
20	12.5	15	5	5	5	2.5	15	5	0	0	0	2.5	0	2.5	2.5	15	0	7.5	5	2.5	2.5	2.5	2.5	2.5	2.5	2.5	2.5	5	5	12.5	12.5	0	5	2.5	15	5	7.5	12.5	15	7.5	2.5	2.5	5	10	2.5	2.5	2.5	2.5	5
21	20	0	8.57143	17.1429	17.1429	2.85714	2.85714	11.4286	2.85714	5.71429	20	11.4286	2.85714	0	20	0	8.57143	14.2857	5.71429	5.71429	11.4286	14.2857	8.57143	20	0	5.71429	5.71429	2.85714	5.71429	5.71429	5.71429	14.2857	5.71429	11.4286	8.57143	0	17.1429	22.8571	14.2857	2.85714	14.2857	11.4286	5.71429	2.85714	5.71429	2.85714	5.71429	2.85714	8.57143
22	5.71429	5.71429	2.85714	5.71429	2.85714	0	0	2.85714	5.71429	5.71429	8.57143	17.1429	0	0	11.4286	11.4286	8.57143	2.85714	11.4286	11.4286	0	8.57143	5.71429	5.71429	2.85714	11.4286	17.1429	2.85714	8.57143	0	2.85714	5.71429	5.71429	0	2.85714	0	11.4286	8.57143	14.2857	8.57143	2.85714	14.2857	2.85714	5.71429	14.2857	5.71429	2.85714	5.71429	0
23	15.75	9	18	18	6.75	6.75	11.25	15.75	11.25	20.25	15.75	11.25	18	24.75	13.5	20.25	18	13.5	9	13.5	20.25	20.25	4.5	13.5	33.75	18	27	27	6.75	11.25	9	11.25	18	11.25	11.25	6.75	15.75	6.75	13.5	11.25	4.5	11.25	6.75	6.75	6.75	9	13.5	4.5	9
24	11.4286	11.4286	13.7143	20.5714	22.8571	13.7143	13.7143	9.14286	13.7143	13.7143	18.2857	9.14286	18.2857	11.4286	20.5714	18.2857	6.85714	9.14286	16	4.57143	13.7143	11.4286	16	11.4286	9.14286	16	16	22.8571	25.1429	11.4286	11.4286	11.4286	9.14286	11.4286	22.8571	18.2857	18.2857	9.14286	13.7143	6.85714	11.4286	9.14286	18.2857	18.2857	18.2857	20.5714	9.14286	11.4286	11.4286
25	10	12	12	12	8	8	10	10	16	12	16	8	8	14	8	18	8	10	4	8	10	6	18	4	2	14	10	14	18	4	16	8	8	4	26	8	10	8	18	12	18	22	18	16	24	6	8	26	10
26	22	6	8	8	10	8	10	22	12	16	6	2	18	18	10	20	10	12	18	18	22	8	12	4	16	14	10	14	10	20	8	12	10	6	16	14	20	18	6	8	14	14	8	4	12	20	10	20	0
27	2.25	4.5	15.75	2.25	6.75	4.5	6.75	18	6.75	9	9	18	13.5	2.25	6.75	6.75	6.75	13.5	15.75	6.75	6.75	15.75	13.5	2.25	11.25	20.25	0	9	13.5	6.75	9	0	6.75	6.75	6.75	6.75	4.5	4.5	4.5	9	15.75	11.25	27	9	9	9	11.25	2.25	11.25
[truncated: 351 more columns]

## Sheet: Figure 1G
		Avg firing rates		Avg z-scores						Avg firing rates		Avg z-scores						Avg firing rates		Avg z-scores
Session	CGRPl #	CS (1s from onset)	US (3s from onset)	CS (1s from onset)	US (3s from onset)			Session	CGRPl #	CS (1s from onset)	US (3s from onset)	CS (1s from onset)	US (3s from onset)			Session	CGRPl #	CS (1s from onset)	US (3s from onset)	CS (1s from onset)	US (3s from onset)
Hab	1	12.24	11.8074	0.151498	0.0169014			Cond	1	17.82	42.6667	1.19473	6.7284			Test	1	11.6486	9.02857	0.673111	0.0281342
Hab	2	12.138	10.7852	0.146316	-0.197903			Cond	2	26.0145	50.4	1.68995	6.11558			Test	2	18.846	13.4333	1.44354	0.294774
Hab	3	10.5173	9.24444	-0.371653	-0.665294			Cond	3	18.468	39.9667	1.19193	5.50974			Test	3	12.2966	9.52381	0.781484	0.168451
Hab	4	20.06	18.7037	0.321602	0.112368			Cond	4	20.52	31.2917	0.926663	2.6566			Test	4	13.9166	13	0.328552	0.185631
Hab	5	12.852	12.9	-0.170516	-0.161229			Cond	5	28.296	80.6286	1.8466	10.6771			Test	5	21.492	16.05	0.575788	-0.411018
Hab	6	17.1214	16.5238	-0.0732665	-0.215824			Cond	6	16.74	56.5667	0.680283	8.53092			Test	6	17.01	15.2542	0.253932	-0.0654281
Hab	7	13.7088	10.925	0.438751	-0.206761			Cond	7	19.3011	29.5714	0.788455	2.91434			Test	7	16.9695	14.9792	0.465567	-0.0221206
Hab	8	15.1725	15.8333	-0.275025	-0.169137			Cond	8	13.905	22.7083	0.622837	2.18224			Test	8	23.544	18.6667	0.996416	0.181551
Hab	9	8.88857	8.38095	0.416708	0.279295			Cond	9	11.88	28.0833	0.229606	2.92554			Test	9	13.77	11.375	0.371849	-0.0572305
Hab	10	7.43143	6.71429	-0.0294066	-0.164701			Cond	10	11.61	55.2083	0.285314	9.82135			Test	10	9.18	8.58333	0.657155	0.493552
Hab	11	7.32214	7.38095	-0.143718	-0.131807			Cond	11	14.04	86.7083	0.036214	8.31751			Test	11	10.152	8.02083	1.24516	0.54258
Hab	12	9.76286	11.5238	0.230217	0.553265			Cond	12	14.85	55.125	0.653297	7.11452			Test	12	19.305	14.7083	0.814875	0.262184
Hab	13	7.65	8.875	-0.0842834	0.126904			Cond	13	9.99771	32.3619	0.0511145	4.48133			Test	13	27.486	23.6667	1.1708	0.636862
Hab	14	5.1	5.5	-0.12528	-0.0542552			Cond	14	15.2434	40.7714	0.773442	4.96538			Test	14	16.6629	10.9524	0.480886	-0.330728
Hab	15	20.604	20.5	-0.070058	-0.0858059			Cond	15	19.0389	66.2476	0.144539	5.78248			Test	15	19.17	10.381	1.25827	-0.28755
Hab	16	20.2601	14.2095	0.928613	0.157067			Cond	16	22.464	57.6333	0.536893	4.30194			Test	16	17.1257	7.34286	1.71904	-0.225243
Hab	17	10.812	9.56667	0.0399979	-0.125547			Cond	17	14.4951	44.7619	0.973106	5.6353			Test	17	29.3451	23.2	1.27505	0.397994
Hab	18	7.395	7.125	-0.0548284	-0.10932			Cond	18	9.87429	28.1429	0.209001	3.54617			Test	18	21.6	15	1.18173	0.184645
Hab	19	7.7265	5.91667	0.502388	0.0149623			Cond	19	8.26971	21.1905	0.218203	2.5867			Test	19	16.2	11.6	0.451578	-0.175782
Hab	20	6.63	9.45833	-0.435206	-0.0371403			Cond	20	12.15	38.125	1.2863	6.28969			Test	20	11.421	4.875	1.24617	-0.192276
Hab	21	15.045	12.875	0.400932	-0.00258266			Cond	21	29.97	58.25	0.892118	3.78536			Test	21	17.8971	10.9524	1.39379	0.284074
Hab	22	10.455	8.16667	0.357095	-0.0928512			Cond	22	19.17	31.25	1.45283	3.59368			Test	22	15.7371	8.38095	1.62904	0.19767
Hab	23	6.2475	5.125	0.364692	0.0913251			Cond	23	12.96	16.9167	0.970729	1.80388			Test	23	15.39	15.5417	0.0133718	0.0359057
Hab	24	3.93429	4.7619	0.253845	0.54245			Cond	24	3.645	12.9167	0.104885	3.53039			Test	24	12.4663	11.5048	-0.330001	-0.541259
Hab	25	19.8171	17.1429	0.146963	-0.225484			Cond	25	15.795	45.5833	-0.0907762	5.20556			Test	25	12.636	11.2	0.05869	-0.200718
Hab	26	17.697	14.7	0.789438	0.182318			Cond	26	20.8594	43.2381	0.00120028	3.1119			Test	26	11.52	8.44444	-0.0252872	-0.555552
Hab	27	11.322	12.5	-0.426513	-0.199305			Cond	27	21.1063	34.8571	0.471307	2.90024			Test	27	9.315	8.875	0.183444	0.0998011
Hab	28	8.415	8.25	-0.147129	-0.178274			Cond	28	15.93	31.875	-0.0866714	2.22518
								Cond	29	9.1125	20.6042	0.294783	3.87633

## Sheet: Figure 1H
Pinprick	Time
# cells	-3000	-2950	-2900	-2850	-2800	-2750	-2700	-2650	-2600	-2550	-2500	-2450	-2400	-2350	-2300	-2250	-2200	-2150	-2100	-2050	-2000	-1950	-1900	-1850	-1800	-1750	-1700	-1650	-1600	-1550	-1500	-1450	-1400	-1350	-1300	-1250	-1200	-1150	-1100	-1050	-1000	-950	-900	-850	-800	-750	-700	-650	-600
1	14.58	12.96	11.34	8.1	12.96	14.58	22.68	19.44	12.96	9.72	9.72	9.72	19.44	8.1	6.48	16.2	16.2	17.82	3.24	9.72	11.34	9.72	16.2	1.62	12.96	14.58	12.96	4.86	9.72	8.1	9.72	9.72	12.96	22.68	11.34	11.34	8.1	8.1	17.82	11.34	8.1	14.58	11.34	16.2	16.2	8.1	21.06	11.34	8.1
2	4.62857	18.5143	16.2	16.2	20.8286	41.6571	13.8857	25.4571	9.25714	9.25714	9.25714	11.5714	11.5714	9.25714	18.5143	13.8857	4.62857	13.8857	13.8857	2.31429	11.5714	4.62857	11.5714	6.94286	16.2	20.8286	16.2	16.2	18.5143	4.62857	11.5714	9.25714	16.2	6.94286	20.8286	2.31429	9.25714	9.25714	6.94286	16.2	13.8857	9.25714	11.5714	13.8857	13.8857	9.25714	16.2	9.25714	4.62857
3	17.82	14.58	12.96	11.34	11.34	9.72	9.72	12.96	14.58	14.58	9.72	17.82	17.82	22.68	17.82	11.34	14.58	16.2	0	16.2	12.96	12.96	6.48	9.72	14.58	17.82	24.3	24.3	14.58	17.82	11.34	21.06	30.78	11.34	4.86	11.34	17.82	16.2	24.3	17.82	19.44	19.44	37.26	19.44	32.4	25.92	17.82	21.06	22.68
4	11.8462	10.53	7.8975	13.1625	15.795	10.53	10.53	10.53	10.53	14.4787	9.21375	9.21375	11.8462	17.1112	10.53	14.4787	15.795	13.1625	11.8462	7.8975	11.8462	6.58125	7.8975	13.1625	7.8975	22.3762	10.53	13.1625	9.21375	11.8462	13.1625	15.795	5.265	13.1625	10.53	7.8975	14.4787	9.21375	28.9575	15.795	11.8462	14.4787	17.1112	19.7437	17.1112	14.4787	6.58125	15.795	22.3762
5	16.2	8.1	12.96	11.34	14.58	11.34	14.58	17.82	14.58	11.34	19.44	19.44	19.44	14.58	27.54	17.82	22.68	16.2	21.06	21.06	21.06	17.82	22.68	12.96	24.3	19.44	17.82	8.1	12.96	14.58	16.2	16.2	17.82	19.44	19.44	21.06	11.34	17.82	6.48	14.58	14.58	19.44	16.2	9.72	12.96	22.68	16.2	9.72	24.3
6	17.01	14.175	7.0875	12.7575	9.9225	15.5925	17.01	7.0875	2.835	12.7575	5.67	7.0875	17.01	9.9225	9.9225	11.34	7.0875	7.0875	9.9225	9.9225	5.67	8.505	8.505	8.505	7.0875	8.505	14.175	5.67	8.505	9.9225	14.175	7.0875	14.175	9.9225	11.34	11.34	11.34	8.505	9.9225	5.67	11.34	9.9225	19.845	21.2625	9.9225	9.9225	15.5925	4.2525	12.7575
7	8.1	8.1	2.025	4.05	8.1	8.1	22.275	12.15	8.1	14.175	12.15	6.075	24.3	14.175	10.125	12.15	4.05	14.175	12.15	10.125	6.075	6.075	10.125	8.1	4.05	6.075	6.075	8.1	12.15	8.1	6.075	8.1	16.2	12.15	12.15	8.1	12.15	6.075	4.05	8.1	8.1	2.025	14.175	20.25	10.125	4.05	14.175	14.175	18.225
8	8.1	2.025	12.15	6.075	4.05	6.075	4.05	10.125	8.1	2.025	16.2	4.05	8.1	16.2	12.15	6.075	8.1	12.15	2.025	18.225	4.05	4.05	0	8.1	10.125	4.05	14.175	8.1	6.075	10.125	12.15	8.1	10.125	6.075	8.1	10.125	14.175	10.125	8.1	0	6.075	6.075	12.15	8.1	8.1	4.05	8.1	4.05	8.1
9	16.2	14.175	18.225	18.225	10.125	16.2	2.025	12.15	18.225	8.1	20.25	14.175	12.15	12.15	12.15	12.15	8.1	12.15	10.125	12.15	8.1	8.1	18.225	14.175	8.1	8.1	6.075	12.15	8.1	8.1	8.1	26.325	14.175	16.2	4.05	4.05	10.125	8.1	12.15	10.125	12.15	4.05	4.05	6.075	10.125	10.125	6.075	24.3	12.15
10	0	9.25714	2.31429	16.2	23.1429	27.7714	18.5143	18.5143	9.25714	4.62857	9.25714	16.2	6.94286	20.8286	13.8857	4.62857	9.25714	2.31429	11.5714	4.62857	9.25714	9.25714	9.25714	6.94286	6.94286	18.5143	4.62857	13.8857	16.2	2.31429	13.8857	4.62857	6.94286	9.25714	6.94286	9.25714	6.94286	6.94286	9.25714	11.5714	13.8857	9.25714	9.25714	13.8857	18.5143	13.8857	9.25714	9.25714	4.62857
11	18.225	9.1125	16.4025	12.7575	14.58	12.7575	9.1125	14.58	3.645	1.8225	5.4675	1.8225	5.4675	7.29	9.1125	7.29	18.225	16.4025	12.7575	14.58	9.1125	3.645	12.7575	9.1125	12.7575	10.935	7.29	14.58	1.8225	5.4675	9.1125	7.29	12.7575	5.4675	12.7575	1.8225	1.8225	3.645	9.1125	1.8225	7.29	10.935	12.7575	16.4025	23.6925	20.0475	21.87	20.0475	14.58
12	10.125	8.1	14.175	6.075	16.2	14.175	14.175	14.175	10.125	4.05	2.025	6.075	10.125	2.025	2.025	16.2	4.05	16.2	12.15	2.025	14.175	10.125	12.15	12.15	14.175	6.075	12.15	4.05	10.125	2.025	2.025	16.2	12.15	10.125	10.125	4.05	6.075	6.075	14.175	10.125	2.025	12.15	10.125	14.175	8.1	14.175	10.125	12.15	12.15
13	14.58	12.7575	25.515	10.935	14.58	18.225	30.9825	16.4025	14.58	10.935	9.1125	12.7575	9.1125	14.58	5.4675	14.58	20.0475	18.225	12.7575	14.58	21.87	12.7575	14.58	20.0475	16.4025	21.87	12.7575	7.29	16.4025	14.58	16.4025	12.7575	25.515	21.87	18.225	10.935	7.29	9.1125	14.58	14.58	16.4025	14.58	27.3375	20.0475	20.0475	20.0475	21.87	27.3375	16.4025
14	5.14286	2.57143	10.2857	5.14286	15.4286	7.71429	2.57143	10.2857	5.14286	5.14286	15.4286	15.4286	12.8571	10.2857	10.2857	7.71429	5.14286	7.71429	0	12.8571	7.71429	2.57143	12.8571	10.2857	12.8571	18	18	5.14286	7.71429	25.7143	15.4286	15.4286	15.4286	18	15.4286	10.2857	10.2857	18	41.1429	18	18	5.14286	23.1429	7.71429	12.8571	7.71429	12.8571	12.8571	10.2857
15	23.1429	10.2857	7.71429	15.4286	25.7143	7.71429	2.57143	12.8571	10.2857	25.7143	23.1429	48.8571	12.8571	12.8571	5.14286	10.2857	2.57143	20.5714	7.71429	5.14286	0	0	28.2857	28.2857	25.7143	33.4286	25.7143	28.2857	30.8571	36	30.8571	18	28.2857	28.2857	18	36	30.8571	38.5714	30.8571	36	25.7143	10.2857	12.8571	5.14286	5.14286	2.57143	12.8571	10.2857	7.71429
16	11.5714	6.94286	13.8857	0	23.1429	6.94286	9.25714	9.25714	9.25714	16.2	9.25714	16.2	20.8286	4.62857	4.62857	9.25714	6.94286	0	4.62857	4.62857	4.62857	2.31429	18.5143	16.2	6.94286	27.7714	20.8286	23.1429	11.5714	27.7714	30.0857	13.8857	18.5143	27.7714	16.2	13.8857	20.8286	18.5143	18.5143	13.8857	18.5143	9.25714	13.8857	4.62857	13.8857	4.62857	2.31429	11.5714	4.62857
17	25.7143	25.7143	20.5714	28.2857	23.1429	25.7143	12.8571	15.4286	15.4286	20.5714	18	18	18	0	23.1429	23.1429	15.4286	18	23.1429	23.1429	18	10.2857	23.1429	36	30.8571	36	38.5714	30.8571	23.1429	23.1429	23.1429	12.8571	33.4286	43.7143	23.1429	23.1429	30.8571	28.2857	36	43.7143	36	15.4286	28.2857	25.7143	20.5714	15.4286	18	18	25.7143
18	9	16.2	3.6	19.8	16.2	3.6	16.2	19.8	18	7.2	7.2	19.8	3.6	14.4	16.2	7.2	7.2	12.6	7.2	14.4	10.8	7.2	19.8	16.2	16.2	12.6	14.4	14.4	18	5.4	14.4	9	18	18	12.6	1.8	9	1.8	16.2	3.6	9	14.4	16.2	9	12.6	5.4	14.4	7.2	10.8
19	6.75	15.75	2.25	6.75	20.25	4.5	11.25	9	0	9	9	0	11.25	2.25	6.75	4.5	9	4.5	9	2.25	4.5	11.25	2.25	9	6.75	6.75	9	6.75	9	11.25	20.25	9	0	11.25	9	4.5	15.75	2.25	9	9	13.5	6.75	9	6.75	6.75	9	18	9	4.5
20	9.5	9.5	13.3	7.6	3.8	9.5	17.1	22.8	13.3	5.7	17.1	0	9.5	5.7	0	19	5.7	5.7	9.5	11.4	11.4	3.8	3.8	11.4	19	9.5	11.4	3.8	5.7	5.7	1.9	9.5	5.7	17.1	7.6	7.6	5.7	11.4	7.6	5.7	3.8	7.6	3.8	7.6	9.5	9.5	7.6	7.6	15.2
21	11.25	11.25	6.75	11.25	6.75	2.25	4.5	9	0	2.25	9	6.75	13.5	4.5	0	2.25	13.5	2.25	4.5	4.5	0	6.75	6.75	4.5	9	4.5	0	4.5	6.75	4.5	9	9	2.25	11.25	6.75	4.5	6.75	4.5	0	4.5	4.5	4.5	2.25	2.25	0	9	2.25	4.5	6.75
22	4.5	0	4.5	4.5	6.75	2.25	6.75	9	6.75	6.75	9	18	2.25	4.5	2.25	13.5	2.25	4.5	13.5	6.75	13.5	9	0	6.75	0	2.25	6.75	0	6.75	0	6.75	2.25	11.25	4.5	0	6.75	2.25	2.25	2.25	2.25	0	11.25	4.5	2.25	0	2.25	4.5	2.25	2.25
23	6.75	11.25	2.25	20.25	15.75	11.25	11.25	9	9	11.25	13.5	15.75	9	6.75	2.25	6.75	6.75	0	9	4.5	2.25	6.75	11.25	9	15.75	9	2.25	4.5	11.25	15.75	6.75	6.75	0	9	9	9	6.75	4.5	4.5	6.75	9	6.75	22.5	15.75	2.25	9	13.5	20.25	6.75
24	9.25714	18.5143	6.94286	13.8857	4.62857	4.62857	11.5714	4.62857	6.94286	27.7714	2.31429	11.5714	4.62857	11.5714	9.25714	13.8857	20.8286	4.62857	11.5714	9.25714	11.5714	9.25714	9.25714	13.8857	16.2	6.94286	9.25714	13.8857	13.8857	16.2	9.25714	9.25714	11.5714	6.94286	11.5714	9.25714	4.62857	2.31429	13.8857	11.5714	18.5143	4.62857	4.62857	11.5714	6.94286	6.94286	9.25714	6.94286	20.8286
25	12.8571	10.2857	15.4286	0	2.57143	10.2857	7.71429	10.2857	7.71429	25.7143	15.4286	2.57143	5.14286	2.57143	10.2857	12.8571	10.2857	5.14286	0	12.8571	7.71429	7.71429	2.57143	5.14286	23.1429	7.71429	18	10.2857	20.5714	7.71429	5.14286	10.2857	5.14286	10.2857	7.71429	12.8571	7.71429	5.14286	5.14286	7.71429	15.4286	2.57143	5.14286	15.4286	10.2857	10.2857	18	10.2857	2.57143
26	9.45	7.875	7.875	12.6	17.325	14.175	11.025	17.325	15.75	17.325	17.325	9.45	17.325	17.325	28.35	20.475	11.025	7.875	6.3	12.6	18.9	22.05	15.75	18.9	6.3	12.6	7.875	20.475	20.475	17.325	17.325	14.175	17.325	12.6	9.45	9.45	18.9	14.175	7.875	12.6	7.875	14.175	11.025	14.175	11.025	12.6	9.45	22.05	11.025
27	18	6.75	24.75	20.25	9	15.75	6.75	13.5	20.25	6.75	6.75	2.25	6.75	22.5	18	24.75	9	11.25	22.5	15.75	15.75	6.75	11.25	6.75	6.75	11.25	27	13.5	22.5	9	15.75	18	31.5	15.75	9	13.5	13.5	11.25	9	11.25	9	9	9	6.75	11.25	13.5	9	9	11.25
28	9	4.5	11.25	13.5	9	9	13.5	6.75	18	11.25	15.75	15.75	18	9	20.25	13.5	9	9	11.25	11.25	36	20.25	11.25	4.5	0	15.75	6.75	9	18	9	2.25	6.75	15.75	9	9	9	20.25	4.5	6.75	9	6.75	9	11.25	9	13.5	9	9	13.5	20.25
29	14.4	6.17143	12.3429	16.4571	8.22857	8.22857	16.4571	14.4	10.2857	16.4571	10.2857	6.17143	18.5143	10.2857	4.11429	8.22857	12.3429	10.2857	8.22857	12.3429	12.3429	20.5714	14.4	12.3429	20.5714	6.17143	22.6286	16.4571	14.4	20.5714	22.6286	4.11429	12.3429	6.17143	8.22857	10.2857	8.22857	6.17143	8.22857	10.2857	10.2857	8.22857	16.4571	22.6286	22.6286	10.2857	16.4571	14.4	12.3429
30	8	8	8	10	8	16	6	8	12	2	4	6	8	8	10	4	8	4	2	2	8	0	8	12	12	4	12	14	10	10	10	6	10	8	8	10	6	8	12	10	24	18	4	6	22	12	20	12	20
31	6.75	18	6.75	9	6.75	18	6.75	6.75	15.75	15.75	6.75	15.75	6.75	9	2.25	4.5	4.5	11.25	4.5	4.5	9	4.5	9	4.5	6.75	4.5	6.75	9	9	4.5	0	18	9	2.25	6.75	2.25	6.75	9	4.5	13.5	4.5	6.75	15.75	2.25	20.25	11.25	22.5	0	9
Tailpinch	Time
# cells	-3000	-2950	-2900	-2850	-2800	-2750	-2700	-2650	-2600	-2550	-2500	-2450	-2400	-2350	-2300	-2250	-2200	-2150	-2100	-2050	-2000	-1950	-1900	-1850	-1800	-1750	-1700	-1650	-1600	-1550	-1500	-1450	-1400	-1350	-1300	-1250	-1200	-1150	-1100	-1050	-1000	-950	-900	-850	-800	-750	-700	-650	-600
1	12.6	7.2	7.2	12.6	16.2	23.4	21.6	18	12.6	16.2	10.8	14.4	12.6	10.8	14.4	5.4	14.4	10.8	19.8	16.2	5.4	7.2	14.4	10.8	1.8	9	10.8	5.4	7.2	16.2	9	14.4	7.2	10.8	14.4	16.2	3.6	9	12.6	10.8	5.4	10.8	10.8	16.2	16.2	23.4	7.2	14.4	12.6
2	2.57143	5.14286	20.5714	7.71429	7.71429	12.8571	12.8571	7.71429	15.4286	18	28.2857	2.57143	20.5714	33.4286	12.8571	12.8571	12.8571	10.2857	5.14286	15.4286	18	20.5714	12.8571	28.2857	10.2857	15.4286	12.8571	25.7143	7.71429	18	5.14286	7.71429	12.8571	18	15.4286	10.2857	7.71429	10.2857	18	12.8571	10.2857	7.71429	12.8571	15.4286	12.8571	12.8571	10.2857	2.57143	12.8571
3	14.4	14.4	9	19.8	10.8	9	12.6	12.6	21.6	12.6	3.6	12.6	9	16.2	21.6	14.4	12.6	9	7.2	7.2	7.2	10.8	21.6	18	10.8	3.6	18	23.4	23.4	5.4	7.2	10.8	14.4	18	21.6	16.2	9	18	21.6	21.6	16.2	21.6	9	19.8	14.4	19.8	36	28.8	27
4	21.9375	17.55	17.55	11.7	24.8625	20.475	14.625	10.2375	24.8625	16.0875	5.85	14.625	17.55	17.55	21.9375	7.3125	8.775	24.8625	11.7	10.2375	7.3125	14.625	26.325	29.25	13.1625	17.55	19.0125	38.025	23.4	17.55	11.7	21.9375	14.625	29.25	4.3875	23.4	20.475	21.9375	38.025	29.25	24.8625	24.8625	38.025	32.175	21.9375	27.7875	48.2625	61.425	35.1
5	9	12.6	18	16.2	23.4	16.2	21.6	16.2	16.2	10.8	19.8	10.8	16.2	36	14.4	12.6	16.2	25.2	19.8	16.2	18	16.2	16.2	16.2	14.4	16.2	7.2	16.2	25.2	19.8	16.2	16.2	25.2	25.2	23.4	12.6	16.2	16.2	14.4	23.4	21.6	10.8	23.4	25.2	27	12.6	37.8	27	10.8
6	5.4	9	12.6	16.2	9	5.4	12.6	3.6	18	9	7.2	10.8	5.4	18	7.2	10.8	9	1.8	16.2	10.8	9	3.6	3.6	9	3.6	10.8	16.2	7.2	7.2	5.4	5.4	9	5.4	7.2	14.4	16.2	0	7.2	5.4	5.4	10.8	1.8	7.2	3.6	12.6	7.2	5.4	9	19.8
7	0	15.4286	12.8571	10.2857	15.4286	12.8571	5.14286	2.57143	15.4286	15.4286	15.4286	7.71429	12.8571	10.2857	5.14286	12.8571	5.14286	15.4286	12.8571	12.8571	7.71429	7.71429	7.71429	10.2857	12.8571	7.71429	2.57143	7.71429	12.8571	10.2857	7.71429	7.71429	2.57143	0	7.71429	2.57143	10.2857	7.71429	12.8571	7.71429	5.14286	5.14286	12.8571	5.14286	12.8571	15.4286	0	12.8571	0
8	7.71429	10.2857	7.71429	10.2857	2.57143	7.71429	23.1429	10.2857	12.8571	12.8571	12.8571	7.71429	12.8571	10.2857	7.71429	20.5714	10.2857	12.8571	15.4286	7.71429	12.8571	12.8571	5.14286	10.2857	10.2857	2.57143	7.71429	5.14286	7.71429	23.1429	15.4286	7.71429	10.2857	15.4286	2.57143	10.2857	5.14286	12.8571	5.14286	18	10.2857	7.71429	20.5714	2.57143	15.4286	12.8571	7.71429	7.71429	10.2857
9	20.8286	18.5143	25.4571	18.5143	16.2	18.5143	16.2	11.5714	13.8857	6.94286	11.5714	13.8857	25.4571	11.5714	23.1429	16.2	25.4571	18.5143	16.2	23.1429	18.5143	9.25714	9.25714	23.1429	16.2	16.2	25.4571	20.8286	18.5143	23.1429	18.5143	13.8857	20.8286	13.8857	25.4571	25.4571	30.0857	27.7714	16.2	11.5714	32.4	23.1429	25.4571	6.94286	9.25714	13.8857	4.62857	13.8857	11.5714
10	10.2857	5.14286	5.14286	10.2857	15.4286	28.2857	2.57143	12.8571	20.5714	7.71429	18	20.5714	2.57143	15.4286	15.4286	7.71429	15.4286	23.1429	12.8571	12.8571	15.4286	12.8571	15.4286	23.1429	15.4286	15.4286	15.4286	18	12.8571	18	15.4286	7.71429	10.2857	7.71429	7.71429	12.8571	10.2857	10.2857	20.5714	12.8571	5.14286	7.71429	7.71429	0	5.14286	18	7.71429	23.1429	12.8571
11	4.62857	4.62857	2.31429	2.31429	0	0	2.31429	4.62857	2.31429	2.31429	6.94286	2.31429	2.31429	0	4.62857	9.25714	9.25714	6.94286	6.94286	9.25714	11.5714	2.31429	2.31429	2.31429	4.62857	2.31429	4.62857	0	2.31429	0	2.31429	13.8857	9.25714	9.25714	6.94286	2.31429	0	0	0	2.31429	0	0	0	4.62857	0	0	2.31429	2.31429	20.8286
12	0	2.57143	2.57143	5.14286	0	5.14286	0	5.14286	2.57143	0	2.57143	7.71429	0	0	5.14286	5.14286	10.2857	0	10.2857	5.14286	5.14286	10.2857	0	0	2.57143	2.57143	0	0	0	0	2.57143	7.71429	10.2857	5.14286	5.14286	2.57143	0	0	2.57143	2.57143	0	0	0	0	0	0	0	2.57143	7.71429
13	2.31429	11.5714	9.25714	11.5714	6.94286	0	16.2	9.25714	11.5714	2.31429	6.94286	4.62857	4.62857	4.62857	6.94286	6.94286	18.5143	13.8857	9.25714	4.62857	11.5714	4.62857	4.62857	11.5714	16.2	4.62857	6.94286	4.62857	4.62857	4.62857	0	16.2	16.2	6.94286	4.62857	11.5714	18.5143	2.31429	2.31429	11.5714	6.94286	2.31429	2.31429	2.31429	6.94286	6.94286	4.62857	2.31429	13.8857
14	10.2857	5.14286	7.71429	10.2857	2.57143	7.71429	12.8571	2.57143	5.14286	2.57143	10.2857	5.14286	2.57143	0	5.14286	0	5.14286	10.2857	10.2857	10.2857	10.2857	7.71429	5.14286	2.57143	12.8571	5.14286	12.8571	15.4286	5.14286	2.57143	5.14286	5.14286	0	7.71429	10.2857	0	0	5.14286	2.57143	2.57143	0	7.71429	5.14286	2.57143	2.57143	2.57143	2.57143	0	2.57143
15	10.2857	10.2857	7.71429	2.57143	10.2857	12.8571	7.71429	7.71429	12.8571	10.2857	5.14286	2.57143	0	2.57143	2.57143	2.57143	10.2857	2.57143	10.2857	10.2857	23.1429	28.2857	18	10.2857	23.1429	25.7143	10.2857	15.4286	2.57143	2.57143	7.71429	0	7.71429	2.57143	5.14286	0	2.57143	5.14286	0	10.2857	5.14286	0	5.14286	0	2.57143	2.57143	2.57143	5.14286	2.57143
16	6.94286	11.5714	0	2.31429	6.94286	13.8857	9.25714	9.25714	11.5714	6.94286	11.5714	4.62857	0	2.31429	2.31429	13.8857	11.5714	9.25714	16.2	13.8857	11.5714	23.1429	4.62857	13.8857	16.2	6.94286	13.8857	25.4571	4.62857	4.62857	0	0	6.94286	13.8857	6.94286	4.62857	4.62857	4.62857	6.94286	11.5714	0	2.31429	4.62857	2.31429	0	2.31429	0	0	0
17	15.4286	0	18	10.2857	10.2857	5.14286	15.4286	10.2857	20.5714	2.57143	7.71429	7.71429	2.57143	10.2857	10.2857	18	5.14286	5.14286	12.8571	12.8571	18	7.71429	12.8571	15.4286	12.8571	10.2857	23.1429	10.2857	7.71429	7.71429	5.14286	2.57143	7.71429	15.4286	12.8571	7.71429	5.14286	10.2857	7.71429	7.71429	5.14286	5.14286	10.2857	5.14286	10.2857	5.14286	0	0	5.14286
18	14.4	12.6	21.6	14.4	9	7.2	7.2	32.4	12.6	23.4	9	14.4	23.4	45	27	28.8	19.8	25.2	21.6	19.8	7.2	12.6	9	12.6	19.8	7.2	30.6	7.2	10.8	7.2	21.6	28.8	19.8	9	14.4	19.8	18	3.6	3.6	19.8	1.8	10.8	23.4	16.2	28.8	27	19.8	23.4	9
19	11.25	4.5	6.75	9	13.5	11.25	11.25	13.5	9	6.75	15.75	13.5	9	4.5	9	6.75	4.5	2.25	2.25	15.75	9	0	4.5	9	9	9	2.25	2.25	9	0	6.75	13.5	2.25	6.75	18	6.75	9	6.75	6.75	13.5	11.25	2.25	9	11.25	6.75	6.75	6.75	9	4.5
20	4.275	14.9625	17.1	8.55	6.4125	6.4125	6.4125	10.6875	6.4125	6.4125	10.6875	2.1375	10.6875	4.275	2.1375	6.4125	4.275	8.55	6.4125	14.9625	8.55	12.825	4.275	6.4125	6.4125	2.1375	6.4125	2.1375	0	17.1	10.6875	12.825	4.275	4.275	8.55	6.4125	2.1375	2.1375	0	2.1375	2.1375	8.55	4.275	6.4125	10.6875	4.275	6.4125	2.1375	0
21	0	2.57143	7.71429	2.57143	7.71429	0	7.71429	18	5.14286	2.57143	5.14286	7.71429	2.57143	5.14286	7.71429	7.71429	2.57143	2.57143	2.57143	2.57143	0	0	0	2.57143	5.14286	2.57143	5.14286	0	5.14286	5.14286	5.14286	7.71429	2.57143	2.57143	2.57143	0	2.57143	2.57143	7.71429	7.71429	7.71429	5.14286	5.14286	0	7.71429	7.71429	5.14286	10.2857	2.57143
22	4	2	10	14	2	2	4	4	2	0	0	0	12	14	6	4	0	0	6	2	2	0	2	0	4	8	14	10	28	12	14	12	10	6	4	20	10	8	6	6	4	2	2	4	4	4	10	4	16
23	15.4286	18	12.8571	25.7143	12.8571	30.8571	20.5714	20.5714	2.57143	7.71429	15.4286	5.14286	23.1429	2.57143	7.71429	7.71429	10.2857	7.71429	5.14286	15.4286	5.14286	2.57143	10.2857	5.14286	5.14286	12.8571	2.57143	10.2857	5.14286	7.71429	5.14286	5.14286	7.71429	2.57143	12.8571	0	2.57143	10.2857	5.14286	7.71429	10.2857	12.8571	30.8571	10.2857	10.2857	7.71429	2.57143	2.57143	5.14286
24	8.1	12.15	16.2	10.125	12.15	6.075	8.1	10.125	8.1	2.025	4.05	0	0	12.15	8.1	8.1	10.125	10.125	4.05	6.075	4.05	4.05	14.175	6.075	16.2	10.125	10.125	8.1	2.025	8.1	20.25	14.175	14.175	8.1	12.15	10.125	2.025	8.1	8.1	16.2	10.125	22.275	20.25	14.175	16.2	6.075	16.2	14.175	12.15
25	13.5	4.5	13.5	13.5	9	9	2.25	2.25	9	9	2.25	6.75	6.75	15.75	11.25	11.25	6.75	11.25	6.75	11.25	11.25	4.5	6.75	15.75	9	9	4.5	9	6.75	9	20.25	18	4.5	11.25	11.25	18	9	11.25	13.5	18	13.5	11.25	20.25	22.5	13.5	15.75	11.25	18	11.25
26	11.025	7.875	18.9	23.625	15.75	12.6	15.75	12.6	15.75	7.875	12.6	9.45	7.875	14.175	9.45	4.725	6.3	14.175	7.875	11.025	12.6	9.45	17.325	14.175	11.025	17.325	6.3	9.45	14.175	12.6	14.175	15.75	9.45	17.325	12.6	12.6	4.725	11.025	12.6	18.9	31.5	22.05	22.05	17.325	37.8	15.75	15.75	31.5	18.9
27	18	4.5	13.5	11.25	13.5	20.25	11.25	11.25	20.25	13.5	13.5	9	15.75	9	11.25	6.75	13.5	24.75	9	11.25	20.25	15.75	18	22.5	9	20.25	6.75	24.75	33.75	6.75	9	11.25	6.75	11.25	13.5	9	6.75	18	11.25	13.5	31.5	11.25	27	15.75	15.75	20.25	22.5	33.75	36
28	0	2	4	0	2	6	6	4	6	6	2	0	6	2	2	6	4	2	0	2	2	6	4	12	0	4	6	0	0	4	0	4	6	10	4	2	6	10	10	6	10	2	10	4	10	6	8	16	18
29	16.4571	14.4	18.5143	14.4	16.4571	18.5143	12.3429	14.4	18.5143	20.5714	18.5143	4.11429	12.3429	16.4571	12.3429	16.4571	12.3429	10.2857	20.5714	8.22857	8.22857	6.17143	16.4571	24.6857	10.2857	22.6286	4.11429	22.6286	12.3429	14.4	8.22857	12.3429	22.6286	10.2857	28.8	14.4	18.5143	32.9143	18.5143	12.3429	18.5143	24.6857	18.5143	14.4	14.4	8.22857	16.4571	14.4	26.7429
30	8	14	6	10	6	16	12	12	8	8	14	16	4	12	6	10	12	16	20	24	10	12	8	4	10	14	2	12	12	8	14	14	6	12	12	18	14	14	12	12	12	14	12	10	12	8	14	24	18
31	6.75	4.5	18	11.25	15.75	15.75	13.5	18	6.75	6.75	15.75	15.75	20.25	11.25	9	9	11.25	18	18	24.75	9	6.75	4.5	9	6.75	15.75	15.75	15.75	9	2.25	15.75	15.75	6.75	11.25	9	4.5	15.75	20.25	13.5	15.75	11.25	22.5	11.25	11.25	13.5	13.5	24.75	9	13.5
Robot	Time
# cells	-3000	-2950	-2900	-2850	-2800	-2750	-2700	-2650	-2600	-2550	-2500	-2450	-2400	-2350	-2300	-2250	-2200	-2150	-2100	-2050	-2000	-1950	-1900	-1850	-1800	-1750	-1700	-1650	-1600	-1550	-1500	-1450	-1400	-1350	-1300	-1250	-1200	-1150	-1100	-1050	-1000	-950	-900	-850	-800	-750	-700	-650	-600
1	4.48	6.72	4.48	7.84	11.2	11.2	7.84	6.72	11.2	7.84	6.72	12.32	10.08	4.48	6.72	5.6	14.56	14.56	14.56	15.68	8.96	7.84	13.44	11.2	8.96	10.08	11.2	8.96	8.96	8.96	7.84	8.96	12.32	13.44	15.68	7.84	8.96	5.6	13.44	12.32	5.6	5.6	7.84	6.72	14.56	8.96	7.84	10.08	11.2
2	12.8	6.4	6.4	11.2	6.4	6.4	9.6	4.8	4.8	12.8	14.4	3.2	9.6	9.6	17.6	6.4	3.2	11.2	6.4	9.6	6.4	8	8	4.8	8	8	4.8	12.8	8	9.6	3.2	6.4	11.2	4.8	8	17.6	8	6.4	12.8	11.2	3.2	8	9.6	11.2	11.2	11.2	4.8	12.8	8
3	8.77714	5.85143	13.1657	14.6286	17.5543	10.24	8.77714	10.24	4.38857	11.7029	5.85143	4.38857	11.7029	13.1657	11.7029	5.85143	10.24	14.6286	5.85143	10.24	10.24	2.92571	10.24	7.31429	8.77714	5.85143	13.1657	10.24	20.48	16.0914	8.77714	10.24	8.77714	13.1657	16.0914	14.6286	10.24	17.5543	11.7029	8.77714	2.92571	11.7029	10.24	10.24	10.24	11.7029	4.38857	4.38857	8.77714
4	8.32	13.0743	8.32	5.94286	8.32	11.8857	13.0743	13.0743	8.32	3.56571	7.13143	5.94286	8.32	7.13143	9.50857	11.8857	9.50857	10.6971	11.8857	19.0171	8.32	10.6971	17.8286	17.8286	7.13143	11.8857	3.56571	8.32	11.8857	7.13143	8.32	15.4514	9.50857	8.32	10.6971	14.2629	8.32	10.6971	14.2629	14.2629	7.13143	11.8857	10.6971	14.2629	11.8857	15.4514	11.8857	11.8857	17.8286
5	10.5326	11.7029	10.5326	14.0434	9.36229	14.0434	14.0434	14.0434	11.7029	11.7029	11.7029	12.8731	8.192	11.7029	12.8731	10.5326	16.384	14.0434	9.36229	19.8949	16.384	8.192	17.5543	9.36229	9.36229	21.0651	9.36229	9.36229	16.384	18.7246	17.5543	16.384	14.0434	10.5326	10.5326	11.7029	15.2137	3.51086	14.0434	18.7246	14.0434	18.7246	12.8731	8.192	12.8731	17.5543	14.0434	12.8731	12.8731
6	10.24	8.96	5.12	11.52	3.84	10.24	12.8	10.24	5.12	6.4	3.84	8.96	6.4	6.4	3.84	1.28	5.12	11.52	8.96	7.68	10.24	5.12	6.4	8.96	14.08	5.12	10.24	23.04	5.12	14.08	15.36	6.4	7.68	8.96	7.68	3.84	7.68	6.4	2.56	10.24	8.96	11.52	14.08	10.24	6.4	7.68	6.4	7.68	11.52
7	7.31429	10.9714	7.31429	5.48571	5.48571	10.9714	9.14286	9.14286	14.6286	12.8	12.8	7.31429	7.31429	9.14286	9.14286	14.6286	5.48571	12.8	20.1143	16.4571	12.8	9.14286	20.1143	9.14286	16.4571	3.65714	14.6286	10.9714	7.31429	29.2571	7.31429	9.14286	10.9714	16.4571	20.1143	5.48571	9.14286	20.1143	14.6286	16.4571	27.4286	18.2857	16.4571	20.1143	14.6286	1.82857	16.4571	18.2857	12.8
8	5.48571	5.48571	3.65714	7.31429	5.48571	9.14286	3.65714	9.14286	3.65714	7.31429	12.8	3.65714	5.48571	3.65714	7.31429	7.31429	9.14286	7.31429	7.31429	1.82857	3.65714	1.82857	7.31429	9.14286	5.48571	5.48571	7.31429	5.48571	3.65714	5.48571	7.31429	7.31429	9.14286	1.82857	9.14286	5.48571	7.31429	3.65714	3.65714	7.31429	5.48571	5.48571	3.65714	12.8	1.82857	12.8	5.48571	3.65714	9.14286
9	10.08	12.96	10.08	7.2	18.72	7.2	8.64	20.16	15.84	20.16	2.88	11.52	7.2	20.16	17.28	10.08	12.96	11.52	15.84	10.08	7.2	15.84	14.4	12.96	18.72	11.52	17.28	12.96	14.4	15.84	15.84	17.28	10.08	15.84	18.72	18.72	14.4	21.6	12.96	8.64	11.52	14.4	12.96	17.28	24.48	14.4	14.4	17.28	14.4
10	8	11.2	11.2	14.4	4.8	11.2	4.8	8	3.2	6.4	11.2	14.4	8	3.2	0	3.2	8	0	1.6	8	4.8	8	8	4.8	3.2	11.2	6.4	8	11.2	6.4	6.4	6.4	19.2	12.8	6.4	12.8	8	4.8	11.2	6.4	8	14.4	3.2	9.6	9.6	12.8	12.8	16	6.4
11	2.88	2.88	4.32	2.88	8.64	4.32	10.08	17.28	20.16	7.2	5.76	1.44	11.52	11.52	11.52	12.96	8.64	7.2	12.96	5.76	11.52	7.2	5.76	7.2	8.64	2.88	2.88	1.44	21.6	8.64	4.32	7.2	7.2	0	4.32	1.44	1.44	2.88	0	5.76	2.88	5.76	2.88	21.6	10.08	5.76	1.44	12.96	27.36
12	2	2	4	2	8	4	10	20	4	6	4	4	4	12	10	6	12	8	8	4	8	8	6	4	4	4	6	2	4	2	2	6	0	2	0	2	0	0	0	2	2	6	6	4	12	4	0	8	10
13	7.2	1.8	1.8	10.8	7.2	10.8	9	10.8	9	7.2	9	5.4	9	12.6	18	9	10.8	7.2	10.8	5.4	5.4	9	9	9	3.6	1.8	1.8	10.8	7.2	7.2	3.6	1.8	1.8	3.6	9	0	0	3.6	1.8	5.4	9	7.2	9	16.2	3.6	3.6	3.6	9	21.6
14	11.4286	0	4.57143	11.4286	9.14286	6.85714	6.85714	9.14286	4.57143	2.28571	0	11.4286	4.57143	11.4286	18.2857	11.4286	0	16	2.28571	2.28571	4.57143	9.14286	2.28571	9.14286	9.14286	9.14286	4.57143	2.28571	6.85714	4.57143	9.14286	2.28571	6.85714	9.14286	13.7143	18.2857	4.57143	29.7143	11.4286	18.2857	9.14286	16	16	11.4286	13.7143	9.14286	16	11.4286	6.85714
15	16	4.57143	9.14286	4.57143	4.57143	0	2.28571	4.57143	9.14286	6.85714	4.57143	9.14286	9.14286	2.28571	0	9.14286	2.28571	6.85714	4.57143	6.85714	11.4286	9.14286	9.14286	13.7143	9.14286	13.7143	9.14286	2.28571	9.14286	16	2.28571	4.57143	9.14286	4.57143	11.4286	11.4286	2.28571	11.4286	4.57143	41.1429	13.7143	6.85714	20.5714	20.5714	11.4286	9.14286	9.14286	13.7143	16
16	8.22857	6.17143	4.11429	2.05714	8.22857	6.17143	4.11429	4.11429	4.11429	14.4	6.17143	10.2857	4.11429	6.17143	8.22857	4.11429	6.17143	2.05714	8.22857	4.11429	4.11429	6.17143	4.11429	0	12.3429	10.2857	6.17143	0	12.3429	8.22857	6.17143	10.2857	2.05714	2.05714	8.22857	16.4571	6.17143	10.2857	4.11429	16.4571	8.22857	4.11429	2.05714	8.22857	6.17143	4.11429	2.05714	12.3429	8.22857
17	11.4286	6.85714	4.57143	9.14286	11.4286	9.14286	4.57143	13.7143	13.7143	18.2857	6.85714	16	11.4286	6.85714	6.85714	9.14286	13.7143	6.85714	6.85714	20.5714	6.85714	16	6.85714	2.28571	16	16	9.14286	20.5714	16	11.4286	13.7143	16	9.14286	6.85714	6.85714	25.1429	16	16	16	16	20.5714	11.4286	11.4286	18.2857	18.2857	9.14286	13.7143	20.5714	6.85714
18	11.2	6.4	6.4	9.6	6.4	9.6	9.6	4.8	14.4	8	20.8	20.8	16	16	17.6	11.2	9.6	3.2	6.4	17.6	6.4	12.8	9.6	16	14.4	11.2	12.8	11.2	16	8	17.6	22.4	4.8	9.6	14.4	19.2	20.8	6.4	17.6	16	11.2	6.4	11.2	4.8	9.6	9.6	4.8	6.4	3.2
19	6.85714	4.57143	9.14286	4.57143	6.85714	2.28571	9.14286	4.57143	9.14286	6.85714	4.57143	2.28571	2.28571	0	4.57143	6.85714	11.4286	2.28571	6.85714	2.28571	11.4286	2.28571	13.7143	9.14286	6.85714	0	0	9.14286	2.28571	9.14286	4.57143	6.85714	9.14286	2.28571	9.14286	9.14286	6.85714	6.85714	9.14286	6.85714	11.4286	6.85714	0	6.85714	6.85714	9.14286	6.85714	4.57143	6.85714
20	5.06667	1.68889	5.06667	0	1.68889	13.5111	11.8222	20.2667	8.44444	8.44444	8.44444	8.44444	5.06667	1.68889	1.68889	1.68889	6.75556	10.1333	3.37778	1.68889	5.06667	5.06667	5.06667	1.68889	0	1.68889	0	5.06667	1.68889	3.37778	5.06667	11.8222	3.37778	15.2	15.2	13.5111	10.1333	5.06667	0	8.44444	1.68889	10.1333	5.06667	11.8222	11.8222	3.37778	15.2	3.37778	5.06667
21	9.14286	2.28571	2.28571	6.85714	2.28571	9.14286	2.28571	2.28571	9.14286	4.57143	2.28571	2.28571	2.28571	4.57143	4.57143	4.57143	4.57143	4.57143	2.28571	0	0	4.57143	2.28571	0	4.57143	2.28571	0	0	0	0	2.28571	4.57143	2.28571	2.28571	11.4286	4.57143	6.85714	4.57143	4.57143	2.28571	4.57143	9.14286	4.57143	6.85714	13.7143	6.85714	9.14286	9.14286	2.28571
22	4	4	4	0	2	14	6	4	0	2	6	0	0	0	4	0	4	4	2	2	0	0	0	0	2	2	2	0	4	2	0	4	6	6	0	14	10	12	8	4	0	2	2	10	4	2	2	6	8
23	6	16	2	4	12	8	4	6	8	8	4	16	0	4	4	4	6	8	6	4	8	4	4	14	8	8	14	16	6	8	6	12	14	4	14	12	20	10	14	18	6	10	18	4	2	10	4	10	10
24	3.6	14.4	19.8	1.8	14.4	7.2	5.4	16.2	5.4	18	14.4	0	9	5.4	3.6	14.4	3.6	5.4	7.2	9	7.2	5.4	14.4	10.8	5.4	7.2	7.2	19.8	7.2	9	12.6	3.6	9	12.6	9	14.4	10.8	14.4	14.4	18	10.8	9	12.6	10.8	12.6	9	9	14.4	16.2
25	4	8	8	10	6	10	6	4	16	8	10	4	12	6	10	8	10	0	8	6	12	6	8	4	8	6	6	16	10	12	4	10	8	6	10	8	10	10	12	4	12	6	10	16	4	12	16	8	22
26	8.4	14	14	19.6	7	9.8	9.8	12.6	9.8	12.6	8.4	11.2	8.4	8.4	8.4	14	14	15.4	12.6	8.4	14	8.4	4.2	16.8	15.4	4.2	19.6	15.4	18.2	18.2	12.6	8.4	15.4	11.2	14	19.6	19.6	33.6	26.6	26.6	26.6	28	5.6	22.4	15.4	22.4	21	28	23.8
27	12.5	17.5	17.5	7.5	22.5	12.5	7.5	15	10	12.5	10	22.5	15	10	20	15	17.5	15	17.5	22.5	15	5	20	25	5	2.5	10	12.5	25	25	15	22.5	17.5	20	22.5	20	25	22.5	17.5	20	17.5	27.5	22.5	30	12.5	15	7.5	22.5	27.5
28	7.5	2.5	5	20	7.5	2.5	7.5	10	7.5	10	17.5	5	7.5	5	7.5	10	5	0	7.5	2.5	2.5	5	2.5	5	12.5	10	12.5	22.5	10	2.5	2.5	10	17.5	7.5	10	2.5	10	10	5	10	17.5	20	12.5	12.5	22.5	10	10	10	5
29	22.8571	32	16	27.4286	38.8571	20.5714	25.1429	34.2857	32	29.7143	18.2857	18.2857	25.1429	18.2857	22.8571	13.7143	20.5714	22.8571	16	13.7143	20.5714	25.1429	27.4286	20.5714	29.7143	25.1429	25.1429	43.4286	20.5714	20.5714	25.1429	18.2857	25.1429	20.5714	36.5714	32	16	18.2857	32	36.5714	20.5714	32	25.1429	27.4286	11.4286	16	9.14286	20.5714	18.2857
30	20	12.5	27.5	25	22.5	5	12.5	15	22.5	15	15	15	20	17.5	15	5	17.5	12.5	10	12.5	2.5	17.5	10	12.5	5	12.5	17.5	15	22.5	17.5	22.5	7.5	12.5	25	20	17.5	2.5	15	12.5	22.5	10	12.5	20	35	12.5	27.5	5	40	7.5
31	20	15	10	7.5	5	15	15	15	27.5	30	22.5	2.5	15	12.5	10	10	7.5	12.5	12.5	5	12.5	17.5	22.5	5	5	2.5	10	5	15	15	7.5	17.5	10	17.5	15	12.5	12.5	10	15	17.5	15	7.5	7.5	10	17.5	17.5	25	12.5	15
[truncated: 171 more columns]

## Sheet: Figure 1I
	Average firing
# cells	Prinprick	Tail pinch	Robot
1	18.54	49.086	36.4689
2	20.0571	37.1314	21.9077
3	31.32	63.612	43.7282
4	28.665	98.1923	51.2448
5	24.66	43.542	25.2782
6	16.2225	81.378	39.7588
7	19.575	58.6029	43.738
8	12.15	33.6857	14.6426
9	26.1	48.0955	42.3471
10	19.5429	44.7943	28.3077
11	33.4125	79.0329	52.272
12	25.2	39.6771	30.4123
13	34.02	63.8743	39.7108
14	29.1429	69.1714	54.4457
15	51.1429	62.5886	53.4585
16	37.0286	74.9134	45.0467
17	47.4286	75.9857	49.3846
18	35.2	62.1	44.1969
19	9.25	33.0525	21.2661
20	23.6444	67.887	47.159
21	14	32.9914	21.0813
22	16.45	39.76	28.8346
23	26.75	71.6914	54.9077
24	29.5714	78.1042	47.8108
25	30	47.0812	33.1692
26	27.475	90.5625	88.2323
27	28.5	55.89	56.25
28	34.75	78.02	84.2317
29	19.2	40.7973	44.4484
30	24.6667	50.28	43.2865
31	20	42.39	42.6731
