# Supplementary material for: Parabrachial CGRP neurons modulate active defensive behavior under a naturalistic threat
Source: eLife. 2025 Jan 10;14:e101523. doi: 10.7554/eLife.101523 (PMC11798572; doi:10.7554/eLife.101523)
Supplement: Figure 2—source data 1. [file elife-101523-fig2-data1.xlsx]

## Sheet: Figure 2B
	Stim for 30 s
	Off	Off	On	Off	Off	On	Off	Off	On	Off	Off	On	Off	Off	Avg_On
Con	8.44444	9.11111	3.44444	55.1111	24.6667	13.4444	4.11111	0	7.33333	7.88889	0	0	9.22222	12.1111	6.05556
Con	7.66667	3.33333	0	0	3.77778	0	0	17.8889	9.33333	32.5556	30.7778	4.66667	11.2222	0	3.5
Con	9	4	0	0	5.88889	0	10.8889	0	0	8	2.66667	6.88889	3.33333	0	1.72222
Con	0	0	3.77778	3.55556	0	3.44444	0	19.1111	0	0	0	0	5.55556	8.44444	1.80556
Con	4.66667	7.22222	0	4	5.66667	0	0	0	0	9.44444	1.66667	23.2222	0	0	5.80556
Con	11.7778	0	6.77778	4.11111	0	3.33333	23.5556	0	0	3.66667	0	5.33333	48.6667	3.44444	3.86111
Con	5.55556	0	0	9.88889	3.33333	14.5556	50	4.88889	0	0	9.66667	9.77778	23.3333	5.66667	6.08333
Con	0	20.2222	9	0	12.5	8.44444	3.88889	20.6667	5	3.44444	3.66667	13.5556	22.2222	25	9
Con	3.33333	5.66667	0	9	16.4444	4.88889	0	4.44444	18.4444	3.44444	17.6667	0	4.11111	0	5.83333
Con	23.2222	22.4444	0	12.6667	31	10.2222	29.0556	46.9444	10.8889	3.44444	0	5.11111	6.77778	22	6.55556
ChR2	10.8889	0	90.5556	7.5	11.1111	96.8889	19.1111	9.77778	80.2222	12.6667	13.3333	97.7778	6.44444	2.88889	91.3611
ChR2	0	0	89.1111	2.77778	15.5556	73.3333	12.1111	8.44444	65.3333	6.88889	3.33333	65.1111	36.1111	16	73.2222
ChR2	4.44444	0	80.8889	15.5556	5.55556	86.1111	6.88889	3.22222	98.8889	15.2778	5.33333	75.1111	7.66667	9	85.25
ChR2	0	2.33333	70.6667	12	12.2222	76.3333	24.3333	7.44444	75.7778	11	2.5	97.3333	11.3333	9.11111	80.0278
ChR2	0	0	71.1111	35.3889	5	90.4444	13	14.6667	92.7778	15.7222	9.11111	92.4444	7.22222	2.33333	86.6944
ChR2	5.33333	9.55556	98	14.8889	1.77778	98.6667	14.3333	3.77778	100	7.77778	4.55556	99.2222	8.11111	14	98.9722
ChR2	3.55556	3.44444	97.3333	19	15.1111	91.4444	8.33333	6.55556	98.5556	22.2222	20.8889	96.2222	9.44444	11.3333	95.8889
ChR2	7.33333	0	86.8889	17.5556	7.55556	92.4444	8.72222	6.22222	85.4444	10	36.1111	94.1111	11.3333	8.33333	89.7222
ChR2	0	0	65.4444	6.5	10.2222	75.2222	2.94444	7	63.4444	12	5.55556	73	10	5.66667	69.2778
ChR2	8.06667	0	95.5778	19.3111	8.31111	91.6889	9.59444	6.84444	93.9889	11	39.7222	93.5222	12.4667	9.16667	93.6944
Jaws	4.11111	5.44444	0	44.8889	15.2778	5.11111	0	0	6.88889	7.55556	0	0	6.33333	4.88889	3
Jaws	3.88889	0	0	0	0	0	0	16.2778	0	17.7778	25.5556	3.33333	5.77778	0	0.833333
Jaws	0	0	0	0	3.55556	0	7.11111	0	0	4.22222	1.77778	0	0	0	0
Jaws	0	0	0	0	0	0	0	17.6667	0	0	0	0	4.33333	0	0
Jaws	4.22222	0	0	0	5.44444	0	0	0	0	5.22222	0	17.1111	0	0	4.27778
Jaws	11	0	5.33333	0	0	0	13.4444	0	0	3.44444	0	0	37	0	1.33333
Jaws	5	0	0	8.22222	0	5.33333	34.8889	3.77778	0	0	3.77778	4.77778	11.6667	0	2.52778
Jaws	0	9.44444	5.11111	0	5.11111	7.77778	0	9.11111	0	0	0	4.77778	19.8889	10.5556	4.41667
Jaws	0	3.88889	0	3.44444	11.2222	0	0	0	3.88889	0	9.77778	0	3.88889	0	0.972222
Jaws	21.8889	9.88889	0	5.11111	15.4444	9.66667	13.8333	34.3889	3.55556	0	0	4.66667	0	19	4.47222
