# Supplementary material for: Parabrachial CGRP neurons modulate active defensive behavior under a naturalistic threat
Source: eLife. 2025 Jan 10;14:e101523. doi: 10.7554/eLife.101523 (PMC11798572; doi:10.7554/eLife.101523)
Supplement: Figure 3—figure supplement 1—source data 1. [file elife-101523-fig3-figsupp1-data1.xlsx]

## Sheet: Figure 3-figure supplement 1C
Bumping
		Block1	Block2	Block3	Block4	Block5
	Con	1	1	1	1	1
	Con	2	2	3.5	3.5	1
	Con	1	1	1	1	1
	Con	1.5	1	1	1	1
	Con	1	1.5	1.5	1.5	2
	Con	3	2	2	1.5	2
	Con	1.5	1.5	1.5	1	2
	Con	1.5	1.5	2	1.5	1
	Con	3	2.5	2.5	3	2
	Con	1	1	1.5	1	1
	ChR2	1.5	1	1	1	1
	ChR2	1.5	2	1.5	2	1
	ChR2	1.5	1.5	1.5	1	2
	ChR2	2	2	1.5	2	2
	ChR2	1.5	1.5	1	1	1
	ChR2	2	1.5	3.5	3	1
	ChR2	2	2	1.5	1.5	1
	ChR2	2	1.5	1.5	1	2
	ChR2	3	2.5	0.5	1	2
	ChR2	2	1.5	1.5	1.5	2
	Jaws	3	2	1	1	1
	Jaws	1.5	2.5	2	2	2
	Jaws	1	1.5	2	2	2
	Jaws	1	1	2	1	1
	Jaws	1	2	1.5	1.5	1
	Jaws	1.5	1	2	1	1
	Jaws	4	2	2	3	3
	Jaws	1	1	1	1.5	1
	Jaws	2.5	1.5	2	1.5	2
	Jaws	3	3	2	3	1
	Unpaired	1	1.5	2.5	1	1
	Unpaired	1	1.5	2.5	1.5	1
	Unpaired	2	1	1.5	2	1
	Unpaired	2.5	2	2	1	3
	Unpaired	1.5	2.5	1.5	3	3
	Unpaired	3	3	3.5	2.5	1
	Unpaired	3	1	3	2	1
	Unpaired	2	3	2.5	1.5	2
	Unpaired	1.5	4	1.5	2	3
	Unpaired	2.5	1	2	1.5	2

## Sheet: Figure 3-figure supplement 1D
Velocity		-9	-8	-7	-6	-5	-4	-3	-2	-1	0	1	2	3	4	5	6	7	8	9	10	11	12	13	14	15	16	17	18	19	20
	Con	1.9	0.6	1.425	0	0.65	0.7	0	0	0	0.6	0.775	0	0	0	0	0	2.3	0.625	1.35	1.35	0.6	2.625	2.025	0	0.7	0	0.675	0	1.275	1.925
	Con	4.7	2.875	0.925	3.275	1.2	0	0.675	0.675	1.425	1.85	2.5	0.675	1.475	1.525	0	0	0	0.775	1.4	3.35	1	2.675	3.325	1.45	0	2.875	0.8	2.425	3.4	0.6
	Con	0.575	0	0	1.825	2.675	3	1.5	0.55	1.05	0.55	0.725	1.65	1.05	0	1.75	0.575	2.725	0	1.05	1.175	0.7	0	0.575	0	1.125	0.55	3.1	2.725	2.675	2.575
	Con	1.35	0	0.825	1.525	0	0	0.65	0	0.9	0	2.225	3.675	1.35	0	0.775	2.3	0.725	0.65	0	0.625	1.95	0	0	0	3.475	2.525	2.05	1.5	3.4	1.575
	Con	1.375	0.7	3.675	0.975	0.675	0	0.75	0.675	2.45	1.85	1.425	0.725	0.7	1.575	0	1.425	1.35	2.325	3.175	3.15	0	0.825	1.8	3.075	0.7	1.425	0.8	0	0.9	0.675
	Con	1.475	1.55	0	0.725	2.025	1	1.45	1.9	2.025	0	0.75	0	0	0	0.775	1.525	0.8	0	0.7	1.125	0	0	1.6	1.8	0	0.725	1.5	0.875	3.175	0
	Con	0.75	1.975	1.675	0.875	2.85	1.725	3.15	0	2.525	2.9	2.2	0	0.8	1.3	0	0	0	0.825	0	0	0	0	0	0	0.725	0.725	0	0.725	1.75	0.775
	Con	3.225	2.075	0.675	0	1.35	1.575	1.475	2.3	1.35	0.9	0	0	0.675	0.825	0	0	0	0	0.675	0	0	0	0.675	0	0	3.275	0.725	0.75	1.7	1.675
	Con	1.4	0	0.925	0	0.725	1.475	1.025	0.725	3.625	0	0	0	0	0	0	0	0	0	0	0	0	0.875	0	0	1.475	0.725	0.7	0	0.775	0
	Con	1.625	2.25	0.8	0.75	0	0	2.325	1.6	1.625	0	0	0	0	0	0	0	0	0	0	0.725	0	0.85	0.725	0	0.7	0.725	2.3	0	0	0
	ChR2	1.625	1	2.45	3.4	0.65	1.2	0.5	0	0	0	6.975	7.375	7.925	4.275	3.425	5.625	1.475	2.35	1.85	4.25	0	1.125	1.875	1	1.075	0	2.525	3.625	3.45	0.725
	ChR2	1.7	1.125	5.65	1.175	3.175	3.3	1.725	1.3	2.175	0.575	3.05	7.5	4.525	2.225	5.625	1.7	4.75	4.7	2.625	4.4	4.475	3.1	3.8	1.575	2.55	7.625	2.925	3.3	3.075	0.725
	ChR2	2.05	3.1	0.7	1.35	0.65	0	0.625	0	0.625	0.725	4.625	2.2	1.375	9.675	3.425	1.375	5	5.325	5.975	4.5	1.95	2.5	1.5	0.875	5.6	1.35	2.875	6.225	3.7	6.625
	ChR2	1.2	3.25	2.45	1.075	1.075	0	0.55	0	0	3.05	2.975	2.45	1.8	4.625	12.625	2.675	2.5	3.6	2.675	1.15	2.6	4.1	2.925	3.925	2.1	0	0.55	0.925	1.825	3.95
	ChR2	0.775	1.7	2.9	2	1.5	2.25	2.45	0.65	1.3	2.4	1.5	2.25	10.9	4.4	4.925	2.825	2.5	1.325	3.85	2.475	5.425	0.725	2.975	5.25	3.25	0	1.35	3.25	3.725	0.625
	ChR2	0	0	6.2	2.3825	2.65	1.05	0.775	1.475	2.3725	0.975	9.225	0	6.75	6.3	8.275	7.9	3.65	7.275	12.675	5.1	6.725	8.4	5.075	3.4	0	2.275	1.4325	4.475	0.405	3.065
	ChR2	0.875	1.775	0	0	1	0	0	0	0	0.775	2.8	4.8	5.4	2	4.6	4.75	1.75	5.225	5.7	11.575	1.675	6.2	1.8	0	0	0	0.825	3.625	0	0.775
	ChR2	0.9	1.575	0.75	1.55	0.95	0	0	0	1.575	1.65	5.8	9.4	3.85	6.725	4.825	4.15	4.725	4.775	4.775	4.825	3.325	0.8	1.5	0	0	0	0	0	2.925	3.4
	ChR2	0.975	0	0	0	0	0	0	0.825	0.775	1.15	0.775	2.275	4.65	6.825	2.075	5.775	4.65	5.6	0	0	1.475	2.75	1.975	0	0.725	0	0	1.525	3.125	0
	ChR2	1.12222	1.50278	2.34444	1.43694	1.29444	0.866667	0.736111	0.472222	0.980278	1.25556	4.19167	4.25	5.24167	5.22778	5.53333	4.08611	3.44444	4.46389	4.45833	4.25278	3.07222	3.3	2.60278	1.78056	1.7	1.25	1.38694	2.99444	2.47	2.21
	Jaws	0.9	1.925	2	0	0	0	0	2.7	0	0	0.85	0	0	0	0	0	0	0	0	0	0	0	0	0	1.925	0	0	0	0	0
	Jaws	0	0.825	0.825	2.215	3.835	0.975	1.5	0.8	2.4	3.475	1.7	0	0	0	0.8	0	0.85	0	1.8	0.8	0.825	0.85	0.9	3.65	1.775	1.025	1.3	3.35	1.5	5.1
	Jaws	0	1.95	1.05	3.65	0	4.625	2.625	0.8	1.925	4.575	4.575	2.575	4.05	1.7	0.8	2.075	0	0	1.975	4.6	7	5.225	3.375	3	0.875	2.85	1.3	0	0	0
	Jaws	1.6	2.05	1.825	1.1	0	3.025	1.85	2.2	1.4175	1	0	0.9	0	0.775	0	1.325	3.525	1.875	0.8	0	1.975	0	0	1.675	2.725	0	0.975	0.4075	0.775	0
	Jaws	0.6	2.425	1.0325	0.285	1.775	0	0.335	0.935	2.175	0.385	0.825	0.75	1.525	2.6	0.725	0	0.925	0	0	0	0.725	0	0	0	0	0	4.95	2.55	0	0
	Jaws	4.5925	3.7	0.775	2.45	1.8	0.3175	1.3275	0	2.025	4.435	3.6	3.825	5.575	2.65	1.7	4.825	1.7	4.225	3.7	0	0	3.575	0.7525	2.275	0.725	3.525	1.5	2.7	2.775	3.45
	Jaws	1.825	2.725	2.2	3.175	2.9	1.5	1.85	2.125	1.135	1.1	2.005	0	0	0	2.2	5.925	3.8	0	0	1.975	0.75	1.625	0	2.9	0	0	0.75	1.525	0.845	1.625
	Jaws	1.9	0.7225	0.175	0.775	0	0	0.85	0	0.75	0	0	0	0.8	0.95	3.675	1.075	2.875	3.0875	0.775	0.75	1.6	0	1	0.8	0	0	0	2.6	4.725	1.8
	Jaws	0.975	0.725	1.8	0.7	2.975	0	0.975	0.775	0	1.2475	2.55	0	0	0	0	0	3.825	0	0.7	0	0	0	0	0.95	1.095	1.725	0.725	4.825	1.475	4.125
	Jaws	0.775	0.7	1.425	0.7	0.385	2.8	0.875	1.475	2.5	1.6	0.75	0	0	0	0	0	0	0	0	0	0	0	0	0.85	0	0	0	0	1.9	0
	unpaired	3.95	1.1	2.4	2.1	0.3	1.15	1.7	0.25	1.3	1.6	1.35	0.1	0.78	1.28	1.15	0	1.45	1.4	1.15	1.4	4.35	0	0	0	1.55	0	0	0	0	1.25
	unpaired	1.1	2.2375	1.42875	0.6925	0.8875	1.5125	1.0925	1.5675	1.79625	0.6925	0.4125	0.825	0.7625	1.6875	0.3625	0.6625	1.13	0.9375	0.4	0	1.35	0	0	0.8375	1.3625	0	2.9625	1.47875	0.3875	0
	unpaired	0.875	0.7125	0.61	0.7	1.68	1.4	0.925	1.125	1.25	1.42375	1.65	0	0	0	0	0	1.9125	0	0.35	0	0	0	0	0.9	0.5475	0.8625	0.3625	2.4125	1.6875	2.0625
	unpaired	0	1.1	0.45	0	1.3	0	0	0.1	1.6	0	0	0	0	0	0	0	0	0	0	0	1.35	2.25	1.1	0	0	3.85	0	0	0	1.1
	unpaired	0	0	0.3	0	0	0	1.65	3.25	1.3	1.3	0.89	1.55	0	0.9	1.5	0	1.45	1.4	1.15	1.4	3	0	0	0	0	0	0	0	0	1.3
	unpaired	1.25	0.55	0.25	0	1.05	0	0.7	1.65	2.275	3	3.25	1.2	0	2.55	1.02	0.575	0.8	0	0	0	1.975	1.125	0.55	0	3.3	3.275	4.65	3.12	1.4	4.9
	unpaired	0	0	1.4	0	0.65	0	0	1.075	0.8	2.1	0.675	0.9	1.6	2	2.4	1.75	0.675	0	0.7	0.775	0	0	0	0	0	0	0	0	0.675	0
	unpaired	0	0	0.87	0	0.87	0	0	0.53	1.67	0	0	1.2	1.13	1.4	2.3	2.33	0	0	0.93	1.03333	0	0	0	0	0	0	0	0	0.9	0
	unpaired	2.6	0.55	0.5	1.05	0.68	0.575	4.2	3.625	1.525	3.3	1.2	1.15	1.3	0	1.2	0.875	1.4	0.7	1.275	1.475	2.825	0	0	0	2.425	0.675	2.325	3.15	1.375	2.13
	unpaired	1.25	0	0.25	0	1.05	0	1.7	1	1.75	1	0.65	0.2	2.6	0	1.25	0	1.35	0	0	0	1.3	0	0	0	3.3	1.35	4.65	1.32	1.4	1.35
