# Supplementary material for: Parabrachial CGRP neurons modulate active defensive behavior under a naturalistic threat
Source: eLife. 2025 Jan 10;14:e101523. doi: 10.7554/eLife.101523 (PMC11798572; doi:10.7554/eLife.101523)
Supplement: Figure 3—source data 1. [file elife-101523-fig3-data1.xlsx]

## Sheet: Figure 3B, C, E and F
Freezing				Cond
		Hab		Block1	Block2	Block3	Block4	Block5		Test
	Con	4.5		0	0	31.4286	18.5714	15.7143		60.25
	Con	12.25		0	33.5714	42.8571	36.4286	54.2857		14.5
	Con	6.75		33.5714	17.1429	22.1429	38.5714	50		39
	Con	0		28.5714	23.5714	34.2857	30.7143	30		31.25
	Con	13.75		3.57143	15.7143	47.8571	34.2857	57.1429		33.25
	Con	24		32.8571	56.4286	45	35	40		37.5
	Con	6.5		12.1429	22.8571	24.2857	39.2857	40		66.5
	Con	15		13.5714	27.1429	49.2857	45.7143	30		54.5
	Con	11.75		35.7143	50	46.4286	43.5714	57.1429		37.5
	Con	0		7.14286	27.1429	42.1429	51.4286	55.7143		75.5
	ChR2	7.5		21.4286	43.5714	44.2857	40.7143	35.7143		18.75
	ChR2	17		7.14286	14.2857	7.14286	30	21.4286		9.25
	ChR2	0		21.4286	21.4286	25.7143	19.2857	35.7143		6.25
	ChR2	0		7.14286	17.1429	22.1429	24.2857	48.5714		15.25
	ChR2	8.75		21.4286	27.1429	28.5714	16.4286	27.1429		11.25
	ChR2	0		14.2857	19.2857	14.2857	35.7143	42.8571		16.5
	ChR2	34		14.2857	45	63.5714	62.8571	31.4286		19.5
	ChR2	11.25		2.85714	45.7143	27.1429	45	62.8571		11.5
	ChR2	6.5		10.7143	58.5714	66.4286	81.4286	47.1429		34.5
	ChR2	15		13.4127	32.4603	33.254	39.5238	39.2063		24.5
	Jaws	0		7.14286	21.4286	19.2857	28.5714	18.5714		26.75
	Jaws	0		10	11.4286	9.28571	11.4286	7.85714		29.5
	Jaws	0		15	7.14286	32.1429	21.4286	18.5714		22.25
	Jaws	0		7.85714	9.85714	4.28571	5.71429	20		19.75
	Jaws	3.5		17.1429	10.7143	35.7143	40	38.5714		31
	Jaws	2.5		6.42857	5.71429	20.7143	20	43.5714		15.5
	Jaws	34.5		17.8571	30.7143	29.2857	28.5714	28.5714		32.5
	Jaws	11.75		16.4286	15.7143	20.7143	14.2857	18.5714		26
	Jaws	27		11.8571	9.21429	49.2857	15	35		27.75
	Jaws	35		8.07143	22.8571	14	17	29.2857		57.5
	Unpaired	2.5		0	10	11.5	11	5		21.5
	Unpaired	0.5		0.5	0	0	10	22		19.75
	Unpaired	20.75		0	23.5	6	47	21.5		9.25
	Unpaired	0		0	11.5	25.5	59.5	63		9.25
	Unpaired	0		14.5	6.5	16.5	0	30		14.5
	Unpaired	2.75		11	31	42	10.5	17.5		36.25
	Unpaired	0		5.5	0	5.5	5.5	25.5		11
	Unpaired	3.75		34	48	9.5	15.5	43		24
	Unpaired	12		0	23.5	18.5	0	7		16
	Unpaired	20.25		19.5	43	50	45	62.5		25.75
Flight score				Cond
		Hab		Block1	Block2	Block3	Block4	Block5		Test
	Con	0.931648		4.55156	6.701	5.53389	3.70724	3.53846		0.285402
	Con	0.719092		1.78094	3.7807	5.90645	2.48749	6.09827		1.16772
	Con	0.848508		3.96829	1.93171	7.34207	5.57011	8.00629		1.12015
	Con	0.781373		4.07195	5.5091	11.7324	6.80635	3.6213		0.970214
	Con	0.911535		3.93137	4.44991	5.14745	6.14824	7.55224		0.853551
	Con	1.01146		3.76991	5.09342	7.66238	6.01136	5.07826		0.466111
	Con	0.973867		3.34028	5.48832	6.86602	5.06226	4.12658		0.426414
	Con	0.610193		3.83737	3.67333	4.41407	5.43061	4.68627		0.513896
	Con	1.06658		3.94912	2.86056	3.85776	3.52448	3.85577		1.21971
	Con	0.903589		3.70892	4.0074	5.04595	4.67245	4.22288		0.684765
	ChR2	0.899328		10.5908	9.88356	10.5547	12.0075	14.2083		7.43495
	ChR2	1.38293		5.11721	6.28378	6.78252	12.831	14.589		6.13462
	ChR2	0.735584		5.65249	10.5228	10.5711	13.4994	14.3163		6.34884
	ChR2	0.985979		7.65157	9.22967	12.8212	9.58483	22.3818		5.37134
	ChR2	0.741282		11.174	17.3198	17.8371	12.5187	15.3852		5.35037
	ChR2	0.840692		6.35983	11.5478	8.77467	14.1096	15.8043		3.29883
	ChR2	1.01523		5.75685	8.65677	9.18192	15.5827	7.22727		2.7787
	ChR2	1.02841		4.51761	6.48669	14.681	7.69336	10.1549		3.94038
	ChR2	0.914891		3.59921	9.42154	6.84475	7.51291	7.16667		3.63909
	ChR2	0.94004		6.2815	10.6865	11.4639	11.4835	11.1477		5.11109
	Jaws	1.0501		1.59855	1.51076	1.06033	2.01195	1.82945		1.26856
	Jaws	1.12383		1.3569	1.58617	2.18675	1.82469	0.972028		0.848771
	Jaws	1.04174		1.22635	1.74188	1.25751	0.981141	1.51055		1.57198
	Jaws	0.797891		1.74289	1.47646	1.34212	1.10685	0.768786		1.76515
	Jaws	0.949492		0.810835	1.01577	1.19743	1.06442	1.525		0.726665
	Jaws	1.01669		2.17686	1.58283	1.16447	1.6159	1.09211		1.02037
	Jaws	1.01204		1.36296	1.94447	2.59252	1.78625	1.05044		1.05979
	Jaws	1.21717		1.69105	1.74946	1.57783	1.42332	1.30455		1.97864
	Jaws	0.799532		2.03283	1.17175	3.51023	1.8734	0.940199		1.92706
	Jaws	1.05125		1.17888	1.16213	1.79063	1.23173	1.63823		1.7728
	Unpaired	1.1164		1.49	5.72	3.5	4.84	2.38		1.9931
	Unpaired	1.38755		0.77	3.03	2.09	4.48	2.73		2.40049
	Unpaired	0.817105		0.82	7.32	1.48	4.69	4.05		2.07638
	Unpaired	0.994557		0.57	4.83	1.68	3.86	7.85		1.69912
	Unpaired	1.13169		0.6	0.71	1.48	3.29	4.03		2.62241
	Unpaired	1.55444		0.77	2.34	6.28	5.22	5.59		1.44882
	Unpaired	0.717605		2.99	3.82	1.62	1.11	0.71		1.41371
	Unpaired	0.93878		4.64	1.19	1.84	2.96	2.75		1.74547
	Unpaired	1.34837		1	1.13	8.14	1.57	2.05		1.8205
	Unpaired	1.52865		1	3.33	2.46	4.45	3.35		1.6222

## Sheet: Figure 3D
	-9	-8	-7	-6	-5	-4	-3	-2	-1	0	1	2	3	4	5	6	7	8	9	10	11	12	13	14	15	16	17	18	19	20
Con	0	4.5	2.2	2.5	1.9	1.9	3.5	0	3	2.1	0	2.5	0	0	0	0	0	10.3	20.3	21.3	6.1	3.9	0.5	5.1	5.2	4.4	5.1	9.3	2.1	6.3
Con	5.3	2.2	2.4	4.4	5.1	0	0	0	2.2	0	7.9	0	0	2.4	9.1	5.1	0	17.4	20.9	17.1	1.2	5.3	0	0	6.1	2.5	3.4	2.2	0	0
Con	0	0	0	0	0	3.1	0	0	0	0	2.3	2.1	8.1	3.1	0	0	3.4	16.9	7.5	16.9	7.7	2.3	0	0	0	0	0	0	0	0
Con	0	4.4	0	0	2.2	3.2	0	2.9	0	0	0	7.8	8.7	4.8	0	0	0	15.8	18.1	22.4	5.3	6.2	2.3	4.3	3.2	7.7	2.2	0	0	0
Con	0	0	0	0	2.5	0	0	0	2.3	1.1	5.5	6.9	10.6	0	0	0	0	18	19	23.1	1.2	6.3	16.2	6.9	0	0	0	0	0	0
Con	4.1	2.8	0	0	2	0	0	0	0	0	3.2	2.8	0	4.4	2.4	2.3	0	18.9	22.6	12.6	6.7	6.9	3.8	7.7	2.2	0	2	0	0	0
Con	2.6	2.6	0	0	4.3	0	4.6	2.3	0	0	5.1	4.9	4.8	5.3	8.1	5.4	0	16.5	25.2	19.9	5.5	0	0	0	0	0	0	0.9	5	2.5
Con	0	0	0	4.5	0	0	0	0	0	0	0	2.3	4.3	5.3	19.6	7.2	2.8	12.3	19.3	9.8	7.1	0.1	10.6	0	0	0	0	0	0	1.6
Con	4.7	0	0	4	2.6	2.1	4	5.2	8.5	2.8	0	0	2.2	14.8	26.2	8.4	0	17.4	23.1	10.1	1.4	0	0	0	0	0	2	0	0	0
Con	0	2	0	0	0	2	7.1	8.9	0	0	10	9.1	2.9	2.1	4.5	0	0	17.8	20.7	8.1	0	0	0	0	0	0	0	0	0	0
ChR2	0	0	0	8.1	0	0	0	2.6	0	0	0	2	9.4	4.1	0	33.7	4.5	21.7	22.9	6.3	9.1	0	0	0	0	0	1.9	0	0	0
ChR2	0	0	0	2.4	3.2	3.9	0	3.2	4.1	2.3	2	14	18.2	8.1	0	2.3	0	24.6	20.7	14.5	3.6	0	0	0	0	0	0	0	1.9	0
ChR2	0	0	0	0	0	0	0	0	0	0	3.7	0	13.7	8.2	12.6	11.1	0	13.9	20.8	23.6	1.9	3	0	0	4.6	0	0	0	0	0
ChR2	2.3	4.3	4	2	0	1.9	0	0	1.9	0.8	4.7	11.8	37.6	4.7	24.1	0	0	11.7	24	23	6	8.2	0	0	0	0	0	0	0	0
ChR2	4	3.9	2.1	0	0	0	3.2	4.6	0	8.1	7.3	2.1	27.4	7.8	5.2	2.8	33.4	16.6	19.6	22.1	4.9	6.3	2.4	0	0	0	0	0	0	0
ChR2	4.9	0	0	0	2.7	0	0	2.4	4.4	0	12.9	14.9	0	4.9	3.3	5.8	2.3	13.5	21.2	21	3	3.8	5.3	0	7.1	0	2.2	0	0	0
ChR2	0	2.7	2.1	0	0	0	0	0	0	4.9	8.9	4.6	7.1	19.1	2.5	0	0	21.8	25.4	11.3	2.5	6.4	3	2.9	6.2	0	4.8	0	0	5.5
ChR2	0	0	0	0	0	2.3	0	0	2.9	5.3	12.3	4.7	5.9	15	14.8	15.4	0	14.9	21.6	15.1	4.8	5	4.4	0	0	0	0	0	0	0
ChR2	2.6	5	2	0	0	0	0	0	1	5.4	20.6	11.9	2.4	16	3	18	6.3	19.2	19.8	5.7	5.6	1.2	2.2	0	0	2.1	0	0	2	0
ChR2	0	2	4.3	4.1	0	0	0	4.5	0	0	4.2	0	0	18.7	13.2	0	0	12.6	18.5	21.7	5.1	3.3	2.1	0	0	0	2.1	0	0	0
Jaws	2.8	0	3.4	4.1	0	0	2.4	4.6	4.6	3.9	0	7.6	0	3.4	2.5	0	0	23.7	21.6	10.7	12.8	16.2	2.8	1.3	0	0	0	0	0	0
Jaws	2.9	1.3	5.1	0	3.1	1.8	1.5	9.8	4.4	0	2.2	4.5	2	0	9.3	2.4	0	7.9	18.1	12.7	3.7	4.4	3.2	5.2	0	0	14.4	13.1	17.2	12.8
Jaws	0	0	0	0	5.8	6.3	9	14.3	8.8	0	2.9	2.6	2.2	3.6	2.6	7	0	15.9	8.8	20.1	2.8	15.2	1	12.4	4.8	16.1	9.4	5.5	13	2
Jaws	0	2.2	11.4	7.6	3.6	2.3	6.1	0	0	0	5.5	1.8	5.2	4.5	5	2	12.9	7.4	23.2	16.5	1.6	4.3	16.7	14.8	6.5	10.8	0	0	0	2.8
Jaws	3.6	0	0	2.9	2.4	4.7	0	1.4	0	2.1	0	0	7	0	0	2.7	8	11.5	19.1	22.6	6.2	3.6	6.3	3.1	0	0	4.7	0	2.3	0
Jaws	0	4.1	3.1	3.1	3.3	5.1	1.5	0	0	2.2	0	2.7	0	0	2.2	18.5	4.7	11.5	14.2	22.5	2.8	7.6	5.7	0	2.6	0	0	2.1	0	0
Jaws	4.7	13.7	4.1	0	2.7	2.3	9.5	0	0	6.2	3.1	0	0	1.2	2.7	0	0	22.5	22.6	13.9	1.7	6	1.8	7	5	0	5.7	7.1	4.8	0
Jaws	0	0	2.5	0	0	0.6	0	0	0	3.2	0	2.6	0	0	0	14.5	6.3	14.4	7.5	16.2	3.2	2.6	4.8	0	0	0	2.3	0	2.2	0
Jaws	5	6.2	2.9	0	2.3	1.9	1.1	0	0	0	0	2.1	2.1	6.2	2.9	0	0	15.5	12.9	21.5	2.6	3.8	4.7	2.1	5.7	0	11.1	5.4	2.1	2.8
Jaws	4.1	3.5	2.8	2.8	1.4	1.6	3.5	2	7	0	1.9	2	2.2	2.7	0	7.3	2.7	18.7	20.3	11.9	2.3	1.8	2.3	7.3	2.4	7.5	0	2.5	2	2.1
unpaired	7.9	2.2	2.2	4.2	0.6	2.3	0.1	0	0	7.2	7.4	9.1	10	4.2	3.3	0	0	0	0	0	2.7	0	0	0	3.1	0	0	0	0	13.4
unpaired	0	0	2.6	0	0	0	3.3	6.5	2.6	0	3.3	3.1	0	1.8	3	0	2.9	2.8	2.3	2.8	6	0	0	0	0	0	0	0	0	2.6
unpaired	0	0	2.7	0	0	0	0	0	0	0	0	0	0	0	0	3.5	0	0	2.8	3.1	0	0	0	0	0	0	0	0	2.7	0
unpaired	0	0	0	0	0	0	0	0	0	2.6	2.7	0	0	0	0	0	0	0	0	0	0	0	0	0	0	0	0	0	0	0
unpaired	0	0	0	0	0	0	0	2.7	0	5.8	0	0	0	3.7	2.7	0	2.7	0	0	0	0	0	0	0	0	0	0	0	0	0
unpaired	0	0	2.9	0	2.6	0	0	1.6	3.2	0	0	3.6	6.4	4.3	6.9	3.5	0	0	0	0	0	0	0	0	0	0	0	0	0	0
unpaired	0	2.2	0	0	0	0	0	2.6	0	0	0	0	2.1	2.2	0	0	0	0	0	0	2.7	4.5	2.2	0	0	7.7	0	0	0	2.2
unpaired	0	0	0	0	0	0	0	0	2.1	0	2.4	0	0	0	8	2.3	2.2	0	0	0	0	0	0	0	0	0	0	2.4	0	0
unpaired	2.5	0	10.5	0	6.1	0	13.4	8	3.5	6	5.3	8.4	7.2	8	2.5	0	2.7	0	0	0	2.6	0	0	0	6.6	2.7	9.3	12.6	2.8	8.7
unpaired	0	0	0	0	0	0	0	0	0	0	0	0	0	0	0	0	0	0	0	0	0	0	0	0	0	0	0	0	0	0
