# Supplementary material for: Parabrachial CGRP neurons modulate active defensive behavior under a naturalistic threat
Source: eLife. 2025 Jan 10;14:e101523. doi: 10.7554/eLife.101523 (PMC11798572; doi:10.7554/eLife.101523)
Supplement: Figure 4—source data 1. [file elife-101523-fig4-data1.xlsx]

## Sheet: Figure 4B, C, D, and E
freezing					Cond
		Hab	Test		Block1	Block2	Block3	Block4	Block5
	Con	8.55556	47.1111		8.66667	15.1667	48.6667	40.8333	45.8333
	Con	5.22222	55		10.7222	53.5	27.5	30.8333	28.5
	Con	37.7778	77.1111		3.33333	60.3333	84.8333	23.8333	65.8333
	Con	9.44444	55.6667		19.3333	88.1667	62.8333	72.3333	61.5
	Con	27.7778	67.7778		31.6667	27.8333	93.5	91	90.3333
	Con	8.11111	46.2222		12.5	15.5	49.8333	45.5	58.6667
	Con	8.33333	39.3333		6.16667	54.1667	8	38	40.3333
	Con	0	41.1111		14.3333	22.5	40	51.3333	37.6667
	Con	5.55556	34.4444		22.1359	56.1667	52.1399	43.3333	40.5
	Con	14.5556	40.8889		9.44444	25.5	25.1667	28.1667	44.8333
	ChR2	7.11111	58.4444		15.6667	76.3333	72.1667	40.6667	56.1667
	ChR2	40.7778	85.1111		22.6667	78.6667	67.6667	89.8333	61.1667
	ChR2	5.03704	51		0	32.3333	69.1667	87.1667	80.1667
	ChR2	4.11111	84.2222		16.8333	90.6667	74.5	82.6667	70
	ChR2	0	66		21.1667	60.6667	95.3333	60.3333	66.6667
	ChR2	4.22222	65.4444		19.8333	54.1667	60.5	47.1667	66
	ChR2	4.11111	79.7778		15.1111	32.5	39.8889	39.6667	78.3333
	ChR2	23.5556	77.4444		25.6667	37.1667	49.1667	36.1667	78.3333
	ChR2	12.3333	65.1111		13	37.8889	37.7222	75.0556	53.0556
	ChR2	12.4444	62.2778		12.8333	22.0556	32.5556	57.2222	88.7222
	Jaws	6.22222	42.4444		32.3333	39.5	16.6667	38.5	39.1667
	Jaws	4.11111	34.5556		14.6667	8.16667	10.3333	20.5	23
	Jaws	0	6.22222		0	17.0556	24.6111	13.0556	18.2778
	Jaws	0	30.4444		0	9.5	21	24.6111	29.0556
	Jaws	12.0741	50.2222		12.8333	13.8333	15.8333	21.3333	15.9444
	Jaws	11.6667	37.7778		0	8.5	12.2222	13.5	8.72222
	Jaws	17.1111	40.8889		33.5	55.3333	36.3333	25.6667	42
	Jaws	5.62963	42.4444		9.88889	29.8333	27.6667	33.5	16.3333
	Jaws	5.22222	65.6		22	31.8333	18.3889	16.1667	34
	Jaws	11.1111	36.6667		0	19.1667	30.6667	24.3333	41.6667
Flight score					Cond
		Hab	Test		Block1	Block2	Block3	Block4	Block5
	Con	1.8027	1.50238		1.7071	2.01244	0.944392	0.786068	0.483496
	Con	0.441774	0.357253		1.73281	1.08222	0.989667	0.353613	0.358082
	Con	1.47901	0.576391		2.05302	4.57106	1.28905	0.485207	0.437336
	Con	3.0126	0.765379		2.79371	0.855597	2.71391	1.50674	0.992749
	Con	1.06571	0.669246		3.16712	0.566155	1.90662	1.60585	1.01674
	Con	0.427405	1.23669		0.9178	1.84161	0.747881	2.67225	1.09232
	Con	0.929704	0.949434		1.49877	2.06633	3.44084	0.707997	1.01911
	Con	0.928053	1.68776		0.830563	3.35643	0.866232	0.445723	1.44293
	Con	0.242202	1.21676		0.601294	1.13177	0.569548	2.68009	1.23404
	Con	3.4003	0.27429		0.182143	1.04489	4.86844	0.909295	1.17261
	ChR2	2.70635	0.645293		7.22637	0.738426	0.978001	0.254055	0.285387
	ChR2	1.84321	0.496421		1.75723	0.775585	2.29285	0.586151	0.274822
	ChR2	4.11325	1.30681		3.44406	1.98815	1.33525	0.535253	1.54484
	ChR2	2.72853	0.669202		1.13258	1.09005	1.29272	8.19845	1.21573
	ChR2	3.90085	0.852137		4.70385	0.973805	3.19565	2.24958	0.803947
	ChR2	1.88973	0.485604		1.34017	0.569131	1.11935	1.17995	0.671479
	ChR2	3.69003	0.204121		1.94265	2.49228	1.1631	0.953421	1.03576
	ChR2	4.0099	1.7325		2.14958	0.409951	2.90133	1.15137	1.12959
	ChR2	2.47497	0.993309		2.08175	1.39292	0.45848	0.778214	0.905683
	ChR2	3.37371	0.424584		2.16059	5.13748	0.614356	0.370622	0.335018
	Jaws	0.354554	1.31028		1.3473	0.790221	0.705043	0.796729	0.776038
	Jaws	1.14912	1.08941		2.12502	0.422325	0.671418	1.46627	0.705796
	Jaws	1.4411	1.98125		0.798875	1.33761	0.680483	0.9582	0.841087
	Jaws	3.20917	0.497729		1.25431	0.758661	0.91952	0.565452	0.906494
	Jaws	1.54284	1.88214		0.671609	0.644294	0.864933	3.02267	0.347446
	Jaws	1.50958	0.606227		1.40508	0.783747	1.06864	1.18315	1.14392
	Jaws	0.953052	0.574911		0.739251	0.738835	1.29893	0.971737	1.86318
	Jaws	0.456229	0.514447		0.401111	0.934384	0.866098	2.61123	0.973821
	Jaws	1.22206	0.741477		1.44138	0.87387	0.976359	0.928998	0.808897
	Jaws	3.1818	0.728505		0.603103	0.853647	1.08239	0.728894	1.00085
