# Supplementary material for: Parabrachial CGRP neurons modulate active defensive behavior under a naturalistic threat
Source: eLife. 2025 Jan 10;14:e101523. doi: 10.7554/eLife.101523 (PMC11798572; doi:10.7554/eLife.101523)
Supplement: Figure 5—figure supplement 1—source data 1. [file elife-101523-fig5-figsupp1-data1.xlsx]

## Sheet: Figure 5-figure supplement 1A
Bumping		Cond
		Block1	Block2	Block3	Block4	Block5
	70cm/s	1.5	1	1	1	1
	70cm/s	1.5	1	2	1	2
	70cm/s	1	1	1	1	1
	70cm/s	2	1.5	1.5	1	1
	70cm/s	1.5	1	1	1	1
	70cm/s	1.5	2	1.5	2	1
	70cm/s	1	1.5	1.5	1.5	2
	70cm/s	1.5	1.5	1	1	1
	80cm/s	1	3	4	1.5	2
	80cm/s	3	2.5	2	1	2
	80cm/s	6	1.5	2	3.5	1
	80cm/s	4	4	5.5	4	8
	80cm/s	2.5	4	3	2	3
	80cm/s	5	2.5	3.5	3	2
	80cm/s	2.5	1.5	1.5	1.5	1
	80cm/s	3.5	4.5	3	1.5	3
	90cm/s	4.5	5	3.5	2.5	2.5
	90cm/s	3	5	3	3.5	3.5
	90cm/s	6	4	4	2	2
	90cm/s	5.5	3	3	4	4
	90cm/s	4	3	4.5	2.5	2.5
	90cm/s	3	4.5	4.5	3.5	3.5
	90cm/s	3	5.5	4.5	4.5	4.5
	90cm/s	5	6	4.5	4	4

## Sheet: Figure 5-figure supplement 1B
Velocity		-9	-8	-7	-6	-5	-4	-3	-2	-1	0	1	2	3	4	5	6	7	8	9	10	11	12	13	14	15	16	17	18	19	20
	70cm/s	1.375	0.7	3.675	0.975	0.675	0	0.75	0.675	2.45	1.85	1.425	0.725	0.7	1.575	0	1.425	1.35	2.325	3.175	3.15	0	0.825	1.8	3.075	0.7	0.1425	0.8	0	0.9	0.675
	70cm/s	1.475	1.55	0	0.725	2.025	1	1.45	1.9	2.025	0	0.75	0	0	0	0.775	1.525	0.8	0	0.7	1.125	0	0	1.6	1.8	0	0.725	1.5	0.875	0.3175	0
	70cm/s	0.75	1.975	1.675	0.875	2.85	1.725	3.15	0	2.525	2.9	2.2	0	0.8	1.3	0	0	0	0.825	0	0	0	0	0	0	0.725	0.725	0	0.725	1.75	0.775
	70cm/s	3.225	2.075	0.675	0	1.35	1.575	1.475	2.3	1.35	0.9	0	0	0.675	0.825	0	0	0	0	0.675	0	0	0	0.675	0	0	0.3275	0.725	0.75	1.7	1.675
	70cm/s	1.4	0	0.925	0	0.725	1.475	1.025	0.725	3.625	0	0	0	0	0	0	0	0	0	0	0	0	0.875	0	0	1.475	0.725	0.7	0	0.775	0
	70cm/s	1.625	2.25	0.8	0.75	0	0	2.325	1.6	1.625	0	0	0	0	0	0	0	0	0	0	0.725	0	0.85	0.725	0	0.7	0.725	2.3	0	0	0
	70cm/s	1.9	0.6	1.425	0	0.65	0.7	0	0	0	0.6	0.775	0	0	0	0	0	2.3	0.625	1.35	1.35	0.6	2.625	0.2025	0	0.7	0	0.675	0	0.1275	1.925
	70cm/s	4.7	2.875	0.925	3.275	1.2	0	0.675	0.675	1.425	1.85	2.5	0.675	1.475	1.525	0	0	0	0.775	1.4	3.35	1	2.675	0.3325	1.45	0	2.875	0.8	2.425	0.34	0.6
	80cm/s	0.825	0	0.55	0	1.1	0.875	1.3	0	1.875	1.225	0	1.3	2.475	3.4	0	0.85	0.225	1.675	5.375	2.975	4.775	0.65	1.275	0	0.7	0.55	1.275	0	0	0
	80cm/s	1.175	2.15	0.525	1.775	1.5	0	0	2.375	1.325	0	1.1	0.34	0	0.275	2.175	1.875	0.775	2.4	0	0	0	0	0	0	0	0	0	0.7	0.675	0.575
	80cm/s	0	0.75	0.8	0	0.825	0	0.65	0	0.65	0.8	1.8	0	2.25	2.4	2.9	3.425	1.9	0.775	0	0.8	0	0	0	0	0	0	0	0.65	0	0
	80cm/s	0	0	0	0	0	0	0	0	0	0	0	0	1.225	0.975	0	0	0.825	0	0.925	0.875	0	0	0	0	0	0	0	0	0	0
	80cm/s	0	0.725	0	0.825	0	0.7	1.8	1.7	1.75	0	1.775	1.05	0	0.625	0	1.75	0.25	3.475	0	0	0	0	0	0	0	0	0	0	0	0.725
	80cm/s	0	0	1.4	0	0.675	0	0.875	0.8	0.0675	0	1.65	0.75	3.7	1.6	0.825	0.775	4.6	1.5	0	0	0	0	0	0.675	0	0.675	0	0.675	0	0.725
	80cm/s	0.775	1.8	1.8	0.8	0	0.85	0.1	0.0525	0	0	0	1.75	0	0	4.625	2.5	0	0	0	0	0	0	0	0	0	0	0	0	0.775	0
	80cm/s	1.575	1.325	1.525	2.55	0.65	0.75	0.85	0	1.55	0.9	0.65	2.3	1.15	4.75	4.05	3.225	0	0.65	0.675	0.675	0.7	0	0.9	0.725	0	0	0	2.5	2.975	0
	90cm/s	0.075	0.75	0	0	0.725	2.5	0.7	0	0.75	0.7	5.125	9.725	3.8	2.35	5.925	2.675	2	4.625	0.7	0	0	0	0	0	0	0	0	0	0	0
	90cm/s	3.16667	1.56667	1.56667	0	2.46667	4.3	2.6	1.96667	1.36667	2.7	7.56667	4.46667	8.66667	7.4	6.06667	5.56667	4.46667	8.3	3.63333	6.23333	4.9	8	3.8	6.4	1.5	0	2.63333	3.4	4	4
	90cm/s	0.775	0	0.775	0	0.7	1.275	0	2.225	0.65	0	0	6.825	4.5	1.225	2.1	11.8	4.55	1.2	1.35	0	0	0	0	0	0	0	0	0	0	0
	90cm/s	3.15	0	1.2	0.675	1.425	0	0.575	0.6	0	0.725	4.225	3.9	5.4	4.05	1.8	1.275	5	0.6	4.375	1.95	0	0	0	0	0	0	0	0	0	0
	90cm/s	0	0	0	0.85	0.9	0	0	0	1.025	1.65	1.05	2.775	0	0.85	0	3.775	6.35	2.275	9.7	0	0	0	0	0	0	0	0	0	0	0
	90cm/s	0	0.675	0.875	0.625	0	0.65	1.375	1.975	0.625	0	0	4.1	1.475	9	6.875	1.575	7.775	4.575	0	0.875	0	0.625	0	0	0	0	0	0	0	0
	90cm/s	0.775	0.775	0	1.325	1.6	0	0	1.325	1.75	0.675	0.75	0.95	14.275	7.8	2.475	2.2	7.025	3.425	2.75	0	0	2.25	0	0.675	0	0	0	0	0	0
	90cm/s	3.35	1.55	0	2.2	0.675	0.7	0.7	0.725	0.85	1.425	5.275	2.975	1.85	3.85	9.6	4.425	3.375	0	0	0	0	0	1.3	0	0	0	0	1.975	0.775	0.725
