# Supplementary material for: Parabrachial CGRP neurons modulate active defensive behavior under a naturalistic threat
Source: eLife. 2025 Jan 10;14:e101523. doi: 10.7554/eLife.101523 (PMC11798572; doi:10.7554/eLife.101523)
Supplement: Figure 5—source data 1. [file elife-101523-fig5-data1.xlsx]

## Sheet: Figure 5A, B, D, and E
Freezing				Cond
		Hab		Block1	Block2	Block3	Block4	Block5		Test
	70cm/s	4.5		0	0	31.4286	18.5714	15.7143		47.5
	70cm/s	12.25		0	33.5714	42.8571	36.4286	54.2857		46
	70cm/s	6.75		33.5714	17.1429	22.1429	38.5714	50		63
	70cm/s	0		28.5714	23.5714	34.2857	30.7143	30		69.25
	70cm/s	13.75		3.57143	15.7143	47.8571	34.2857	57.1429		36
	70cm/s	24		32.8571	56.4286	45	35	40		49.75
	70cm/s	6.5		12.1429	22.8571	24.2857	39.2857	40		65.5
	70cm/s	15		13.5714	27.1429	49.2857	45.7143	30		26.75
	80cm/s	1.5		25	48.5	24.5	36.5	43		60.25
	80cm/s	8.75		37.5	41.5	58.5	50.5	61		14.5
	80cm/s	7		13.5	24.5	44.5	33	25		39
	80cm/s	6.5		20	18	38	37.5	66		31.25
	80cm/s	7.25		33.5	27.5	15	10.5	21		33.25
	80cm/s	13.25		0	20	24	34	25		37.5
	80cm/s	8		0	10	11.5	33.5	0		66.5
	80cm/s	10.75		26.4286	12.8571	6.42857	30.7143	67.1429		54.5
	90cm/s	11.5		0	6.42857	12.1429	10.7143	65.7143		31
	90cm/s	15.25		12.8571	23.5714	22.1429	28.5714	74.2857		9.75
	90cm/s	10.75		7	32	44	55	62		7.25
	90cm/s	7.25		8	0	43	29	53		17.25
	90cm/s	3.75		0	10	40.7143	30	21.4286		30
	90cm/s	5.75		60.7143	5	20.7143	34.2857	28.5714		20
	90cm/s	6		15.7143	30.7143	80	59.2857	54.2857		36.25
	90cm/s	6		0	19.2857	60	53.5714	35.7143		40.5
Flight score				Cond
		Hab		Block1	Block2	Block3	Block4	Block5		Test
	70cm/s	0.851095		2.93814	3.66176	3.87302	4.49206	5.11111		0.72656
	70cm/s	0.918669		1.01128	6.2963	4.2	4.14286	4.17143		1.04518
	70cm/s	0.985711		4.89254	4.61765	4.42574	6.04	4.65385		0.659831
	70cm/s	0.921353		3.68	4.65385	4.18	5.75	4.91935		0.470155
	70cm/s	1.11578		3.38397	3.68153	3.375	4.73684	4.83333		0.952236
	70cm/s	0.8916		3.65678	3.85897	3.70312	4.88372	4.5873		0.608663
	70cm/s	1.06692		3.88333	4.6699	5.49351	5.41026	4.58333		1.08215
	70cm/s	1.01971		3.9855	4.31767	3.99358	5.50895	4.80218		0.437529
	80cm/s	0.839153		3.79165	5.33822	5.39121	2.15957	4.58416		0.859044
	80cm/s	0.986984		3.52316	4.36099	6.04731	5.9596	5.03125		0.811429
	80cm/s	0.938402		3.27157	5.07831	4.77668	4.32956	6.96923		1.18538
	80cm/s	1.00121		1.86657	2.80815	4.33084	5.34419	5.46154		1.105
	80cm/s	0.923532		3.72412	3.78744	3.76594	4.06559	3.29524		1.43697
	80cm/s	0.883552		3.50577	4.67001	8.01786	3.08537	6.63025		0.661139
	80cm/s	0.952118		3.52999	4.35862	6.64667	12.2209	0		0.782004
	80cm/s	0.997069		3.27287	3.80741	7.51164	4.42228	5.04348		0.49402
	90cm/s	0.956811		4.06488	5.30508	13.6928	8.18068	13.0476		3.51666
	90cm/s	0.937348		3.16627	6.97976	8.51326	12.3716	10.1569		3.00664
	90cm/s	0.997802		4.71506	8.81276	11.228	8.42677	12.5		4.37942
	90cm/s	0.947569		3.04317	8.49332	8.45122	9.83595	7.10938		5.47058
	90cm/s	0.952307		6.23769	8.57679	11.6573	12.8913	9.85294		3.80592
	90cm/s	0.979515		3.69383	11.3619	10.2691	9.4818	8.5122		4.72438
	90cm/s	0.922848		4.54329	15.5348	10.4848	9.33275	18.75		5.95303
	90cm/s	1.00961		4.74457	10.1879	10.5855	10.2077	17.5		2.56385

## Sheet: Figure 5C
Velocity		-9	-8	-7	-6	-5	-4	-3	-2	-1	0	1	2	3	4	5	6	7	8	9	10	11	12	13	14	15	16	17	18	19	20
	70cm/s	2.65	3.35	2.3	3.45	3.5	0.95	1.75	0	2.6	0	3.95	1.25	0	12	0	5	0	13.85	20.6	19.2	3.65	4.6	0.25	2.55	5.65	3.45	4.25	5.75	1.05	3.15
	70cm/s	0	1.6	0	0	1.5	2.1	0	0.97	0.7	0	2.8	7	6.4	0	0	2.9	11	16.9	14.8	20.8	4.7	4.9	6.16667	3.7	1.1	2.6	0.7	0	0	0
	70cm/s	2.65	1.1	1.2	2.2	2.55	1.55	0	0	1.1	0	3.95	1.05	0	1.2	0	11	1.7	17.15	14.2	17	4.45	3.8	0	0	3.05	1.25	1.7	1.1	0	0
	70cm/s	2.05	1.4	0	0	2.25	0	0	0	1.15	0	2.75	0	5.3	2.2	1.2	0	0	18.45	20.8	17.85	3.95	6.6	10	7.3	1.1	0	1	0	0	0
	70cm/s	1.3	1.3	0	2.25	2.15	0	2.3	1.15	0	0	2.1	0	2.4	5.3	8.85	0	14	14.4	22.25	14.85	6.3	0.05	5.3	0	0	0	0	0.45	2.5	2.05
	70cm/s	3.35	2.7	0	0	3.15	0	2.3	1.15	0	0	0	0	2.4	8.5	5.25	0	0	17.7	23.9	16.25	6.1	3.45	1.9	3.85	1.1	0	1	0.45	2.5	1.25
	70cm/s	1.5	0.7	0	2.8	0.87	1.3	3.7	4.7	2.8	0.9	3.3	3.1	1.7	7.4	6.7	2.8	5.9	15.8	21.3	9.3	2.8	0	3.53333	0	0	0	0.6	0	0	0.5
	70cm/s	1.9	1.2	0	1.4	1.9	0.69	2.6	2.7	1.8	0.4	2.5	1.5	3.4	5.3	10.1	1.4	4.7	16.8	21.65	13.9	3.65	2.2	5.1	2.4	0.37	0	0.6	0.15	0.83	0.68
	80cm/s	0	0	7	5.8	4.8	2.5	2.1	8.5	0	0	5.8	0	0	0	4.7	7.1	13.9	12.15	13.65	46	12	0	0	0	0	0	0	0	0	0
	80cm/s	2.1	2.3	0	0	0	0	7.9	0	0	2.4	7	5.8	4.8	2.5	2.1	8.5	4.6	21.25	24.6	24.75	5.5	2.8	0	0	0	0	0	2	0	0
	80cm/s	0	0	0	0	0	0	2.4	2.4	2.1	0	4.8	9.1	2.1	2.3	0	0	0	35.2	25.3	24	0	27.3	0	0	0	0	0	0	0	0
	80cm/s	0	0	0	2	0	0	0	2	0	0	2	2.2	5.8	12.9	3.4	0	0	27.25	31.9	38.75	6.3	7.5	0	0	0	0	0	0	0	0
	80cm/s	2.1	0	0	0	0	0	0	4.7	7.4	2.1	2	2.3	2.1	17.4	2.3	9.7	18.3	41.6	20.85	20.2	3.7	4.8	2.1	0	0	0	0	0	0	0
	80cm/s	0	0	0	2	1.9	0	0	0	0	0	4.7	1	3.3	6.7	6	0	0	11.55	28.5	44	7.9	8.1	1	0	0	0	0	0	0	0
	80cm/s	0	0	0	0	0	0	0	0	0	0	0	0	2.8	0	0	0	0	20.7	22.7	24.65	1.4	5.4	4.3	0	0	0	2.1	0	2.6	4.3
	80cm/s	0	0	0	0	0	2.3	0	2.4	0	0	0	0	0	2.1	3.7	0	15.6	14.1	29.9	33.9	2.2	0.8	2.1	0	0	0	0	0	0	1.9
	90cm/s	0	0	0	0	1.8	2.2	0	1.9	0	0	0	3.1	7.9	2	11.8	1.8	13.8	33.15	35.25	20.95	50	0	0	4.5	2.4	0	0	1.9	0	0
	90cm/s	0	0	0	0	0	0	0	1.8	6	0	4	16	14	18.9	13.1	18	2	32.15	31.55	34.6	5.2	6.9	2.2	0	0	0	0	0	0	0
	90cm/s	0	0	16.2	0	0	0	2.5	0	2.6	0	2.1	17	16.7	2	13.1	9.3	10.7	31.75	42.6	23.4	19.9	2.4	2	0	2.8	2.3	12.9	5.5	0	2.9
	90cm/s	0	0	0	0	0	2.2	0	0	0	0	3.6	11.4	2.1	15.7	0	12.5	7.1	35.95	37.1	20.2	14	4.2	4	0	0	0	0	0	0	0
	90cm/s	0	0	0	0	0	1.8	2.2	0	0	0	0	12	7.5	11.4	3.9	2.2	1.9	32	32.25	31.6	1.9	1.8	2.9	2	0	0	0	0	0	0
	90cm/s	0	0	0	0	0	0	0	0	0	2.1	1.8	2	14.9	12.6	17.3	13.7	0	40.65	33.4	16.15	4.5	1.3	6.8	3.2	0	0	0	0	0	0
	90cm/s	0	0	0	0	0	0	0	2.4	0	0	0	0	6.4	10.4	0	0	5.3	38.1	36.25	23.45	6.2	2.5	4.9	8	2.7	4.8	11.6	5.5	7.5	7.4
	90cm/s	0	0	0	0	0	0	4.2	0	0	0	0	7.4	2.6	14	10.4	4.6	4.9	27.75	35.5	38.05	5	1	6.1	2.7	6	2.1	4.1	0	4.5	10.4
