# Supplementary material for: Parabrachial CGRP neurons modulate active defensive behavior under a naturalistic threat
Source: eLife. 2025 Jan 10;14:e101523. doi: 10.7554/eLife.101523 (PMC11798572; doi:10.7554/eLife.101523)
Supplement: Figure 6—figure supplement 1—source data 1. [file elife-101523-fig6-figsupp1-data1.xlsx]

## Sheet: Figure 6-figure supplement 1A
Bumping
		Block1	Block2	Block3	Block4	Block5
	Con	3.75	5	3.25	3	3
	Con	4.5	4.5	3.5	2.75	2.75
	Con	5.75	3.5	3.5	3	3
	Con	4.75	3	3.75	3.25	3.25
	Con	3.5	3.75	4.5	3	3
	Con	3	5	4.5	4	4
	Con	4	5.75	4.5	4.25	4.25
	Con	1.5	2	0.5	1	2
	Con	2	3	2.5	3.5	2
	Con	4.75	5.5	4	3.25	3.25
	TetTox	1.5	2.75	5.5	4	3.75
	TetTox	2	3	2.5	3.5	2
	TetTox	2.5	5	1.5	1.5	4
	TetTox	5	4.5	3	2	3
	TetTox	4	2.5	3.5	3.5	2.75
	TetTox	6.5	4.5	3.5	4	3
	TetTox	1	2	3	2.5	2
	TetTox	3	4	4	3	3.25
	TetTox	4	4	4.5	3.5	3.75
	TetTox	6.5	5	3	4.5	4

## Sheet: Figure 6-figure supplement 1B
Velocity		-9	-8	-7	-6	-5	-4	-3	-2	-1	0	1	2	3	4	5	6	7	8	9	10	11	12	13	14	15	16	17	18	19	20
	Con	0	0	0.675	1.725	0.775	0	0	0	1.475	0.875	2.325	2.525	6.675	4.65	2.525	0.725	2.975	4.2	3.6	0	3.3	0	0.675	3.125	0.925	1	2.25	2.725	0.85	3.2
	Con	0	0	3	1.1	0.775	0	0.725	0.75	0	0.725	0.8	2.8	2.425	9.775	3.65	13.3	3.75	1.625	0	0	0	0	0	0	0	1.65	0	0	0.675	0
	Con	0.7	2.45	0	0.75	3.125	0.7	1.7	0.7	0.725	0.925	2.525	6.3	5.475	1.65	3.675	6.6	5.325	4.75	0	0	0	0	0	0	0	1	1.75	0.85	0	0
	Con	0.65	2.725	0	1.9	0	0	0	1.7	2.1	0	0.625	4	2.975	4.9	4.625	1.4	4.575	0.675	1.7	2.1	0	0	0	0	0.625	0	0.65	1.275	2.725	4.675
	Con	3.725	1.425	3.4	1.3	0	1.95	2.15	1.425	0	2.1	0	4.25	0.625	0.825	11.825	10.025	0.65	0	2.625	2.375	0	0	0	0	0	0	0	0	0	0
	Con	0	0	0	0.85	0.9	0	0	0	1.025	1.65	1.05	2.775	0	0.85	0	3.775	6.35	2.275	9.7	0	0	0	0	0	0	0	0	0	0	0
	Con	0	0.675	0.875	0.625	0	0.65	1.375	1.975	0.625	0	0	4.1	1.475	9	6.875	1.575	7.775	4.575	0	0.875	0	0.625	0	0	0	0	0	0	0	0
	Con	0.775	0.775	0	1.325	1.6	0	0	1.325	1.75	0.675	0.75	0.95	14.275	7.8	2.475	2.2	7.025	3.425	2.75	0	0	2.25	0	0.675	0	0	0	0	0	0
	Con	3.35	1.55	0	2.2	0.675	0.7	0.7	0.725	0.85	1.425	5.275	2.975	1.85	3.85	9.6	4.425	3.375	0	0	0	0	0	1.3	0	0	0	0	1.975	0.775	0.725
	Con	0.075	0.75	0	0	0.725	2.5	0.7	0	0.75	0.7	5.125	9.725	3.8	2.35	5.925	2.675	2	4.625	0.7	0	0	0	0	0	0	0	0	0	0	0
	TetTox	1.475	1.35	0	0.7	2.45	1.75	0.7	0.55	1.55	1.825	1.6	2.825	1.475	0	0	0.675	0	0	0	0	0	0	1.45	0	0	0	0.7	0.75	0	0.675
	TetTox	0	0	0	0.675	0.725	0.775	0.475	0.9	0.03	0	2	0	1.025	1.4	0	1.025	0.75	0.675	0.675	0	0	0	0	0	1.675	0.175	0.37	0.7	0	0.525
	TetTox	0	7.5	3.325	2.9	2.525	1.55	1.85	4.75	1.975	2.175	3.15	0.9	0.65	0.675	1.4	0	0	1.55	0	0	0	2.375	2.575	0.865	0.25	1.7	0.9	0	1.65	0.925
	TetTox	0.425	0.7	0.625	0	0	1.55	0.925	2.95	2.125	0.75	0	0	1	0.9	0	0	0	1.525	0	0	0	0	0	0	0	0	0	0.65	1.75	0
	TetTox	0	0.85	0	1.925	4.675	0	0	2.7	3.875	1.775	2.15	0	0	0	1.025	0	0	0	0	0.7	0	0	0	0	0	0.7	0.6	0	0.75	2.85
	TetTox	2.4	0	1.7	0.8	0.625	0.8	3.075	0.575	0.85	1.65	0.8	0	0	0	0.775	0	2.825	2.025	1.275	0.9	0	0	0.775	0.875	0	0.775	0.825	4.625	2	0.8
	TetTox	0	0.7	0.625	0	0.725	0	2.35	0.16	1.405	0	0.8	0	1.025	0	0	0	0.75	0	0.675	0	0	0	0	3.875	1	0.175	0.525	0.65	0	0.525
	TetTox	3.025	0	1.95	0.7	0	2.025	2.85	0.55	1.15	1.9	1.975	4.325	0	0	1.675	3.3	1.425	3.475	2.4	0	0	0	0	0	0.625	1.375	0.65	0.8	0.6	3.275
	TetTox	2.375	1.475	0.7	2.4	1.95	0	1.55	1.575	0.8	2.425	3.525	4.225	2.5	2.5	0.75	2.775	0.825	3.275	4.15	1.45	4.325	3.875	2.55	0.725	1.8	2.125	0	0.775	1.75	0
	TetTox	0	0	0	1.95	0.725	2.65	1.525	0.725	2.1	0.9	3	5.6	2.5	6	3.05	0.775	1.75	0.625	2.1	3.975	0.625	0.775	0.7	0	3.65	1.875	3.5	0.775	0	0.325
