# Supplementary material for: Parabrachial CGRP neurons modulate active defensive behavior under a naturalistic threat
Source: eLife. 2025 Jan 10;14:e101523. doi: 10.7554/eLife.101523 (PMC11798572; doi:10.7554/eLife.101523)
Supplement: Figure 6—source data 1. [file elife-101523-fig6-data1.xlsx]

## Sheet: Figure 6B, C, E, and F
Freezing				Cond
		Hab		Block1	Block2	Block3	Block4	Block5		Test
	Con1	7.25		0	6.42857	12.1429	10.7143	65.7143		61.25
	Con2	3.75		12.8571	23.5714	22.1429	28.5714	34.2857		9.75
	Con3	5.75		7	32	44	55	62		47.25
	Con4	6		8	0	43	29	53		50.25
	Con5	6		0	10	40.7143	30	21.4286		33
	Con6	0		10.7143	25	35	14.2857	0		17.75
	Con7	0		33.7857	42.1429	30.7143	40	65.7143		31.75
	Con8	5.75		33.7857	63.5714	81.4286	85	90		25
	Con9	0.15		0	48.5714	11.4286	60	35.7143		24.25
	Con10	2.275		5.71429	45	0	17.1429	54.2857		35.25
	TetTox1	0		7.85714	13.5714	18.5714	12.8571	42.8571		24
	TetTox2	0		7.85714	0	11.4286	15.7143	0		27.75
	TetTox3	0		17.1429	24.2857	16.4286	30.7143	32.8571		19.75
	TetTox4	0		0	12.1429	35	24.2857	35.7143		23
	TetTox5	0.475		7.85714	25.7143	1.42857	8.57143	30		22.5
	TetTox6	0.875		0	27.1429	22.1429	21.4286	30		10.25
	TetTox7	0.75		0	15	22.8571	60.7143	21.4286		0
	TetTox8	6.25		20	20.7143	25.7143	23.5714	28.5714		31.5
	TetTox9	0.75		0	11.4286	39.2857	27.1429	7.14286		2
	TetTox10	3.5		0	0	0	7.85714	0		12.75
Flight score				Cond
		Hab		Block1	Block2	Block3	Block4	Block5		Test
	Con1	0.94708		2.76712	4.93556	10.5164	6.725	12.7511		4.10761
	Con2	0.972685		2.32268	5.38728	7.50649	16.0526	9.6826		2.91491
	Con3	0.965911		3.87013	7.205	8.98532	7.69565	12.8804		4.98182
	Con4	0.966231		2.7619	5.43603	10.2195	9.45238	6.50591		6.5234
	Con5	0.851095		3.61	9.04519	8.77381	16.6957	11.7743		4.9803
	Con6	1.48092		3.12295	9.23235	8.33333	8.44186	10.4538		5.25288
	Con7	0.967968		5.55	10.4221	12.6991	11.4211	15.5417		6.27549
	Con8	0.966767		1.75	10.2519	9.6627	10.0606	13.4784		2.7984
	Con9	1.05369		2.93046	5.74097	9.30692	9.98142	10.455		4.13682
	Con10	1.11734		3.50824	9.7379	9.86724	10.4784	12.812		4.5314
	TetTox1	1.2527		2.13894	4.03846	2.72294	2.61327	5.54124		2.14121
	TetTox2	0.983417		2.34784	0.929089	2.44693	2.63062	3.80473		2.65437
	TetTox3	1.10228		1.84241	1.69057	4.77656	4.26543	0.949495		1.8949
	TetTox4	1.03951		2.35887	2.59231	1.81845	3.17705	1.37857		1.56623
	TetTox5	0.989815		1.86103	1.60657	5.29667	1.29531	2.9404		1.97553
	TetTox6	1.11578		3.65303	6.15206	2.5041	4.07013	4.20492		1.9727
	TetTox7	1.03474		0.967949	1.34185	2.24545	5.84653	3.20492		1.42355
	TetTox8	1.00241		1.60973	3.21937	0.815474	2.00311	3.76516		2.27243
	TetTox9	1.14728		2.85995	0.849439	2.30756	0.986181	2.15948		2.17932
	TetTox10	1.07471		1.32698	1.28111	2.1857	4.63428	3.18977		2.62226

## Sheet: Figure 6D
Velocity		-9	-8	-7	-6	-5	-4	-3	-2	-1	0	1	2	3	4	5	6	7	8	9	10	11	12	13	14	15	16	17	18	19	20
	Con1	0	0	0	0	0.9	1.1	0	1.85	3	2	0	9.55	5.95	10.45	12.45	9.9	1	32.65	33.4	27.775	27.6	3.45	0	0	0	0	2.3	0	2.7	2.2
	Con2	0	0	8.1	0	0	1.1	1.25	0	1.3	0	0	3.7	9.4	8.85	6.55	5.9	8.9	33.85	39.85	21.8	16.95	3.3	2.3	0	0	0	0	0	0	0
	Con3	0	0	0	0	0	0.9	1.1	0	0	1.05	0.9	11	3.75	12	15.6	2.95	4.95	41.325	22.825	23.875	3.2	1.55	2.3	0	0	0	0	0	2.3	2.2
	Con4	0	0	0	0	0	0	2.1	1.2	0	0	0	0	14.5	12.2	14.2	12.3	5.1	32.925	35.875	30.75	5.6	1.75	2.4	0	0	0	0	0	0	0
	Con5	0	0	0	0	0	0	0	0	2	0	9.5	2.4	10.2	2.9	0	0	0	29.8	33.95	11.75	7.9	5.7	0	0	0	0	0	0	0	0
	Con6	0	0	0	0	0	0	0	0	0	0	0	0	0	3.8	11.6	0	2	32.2	33.05	43.6	16.2	6.1	3.6	2.2	0	0	0	0	0	0
	Con7	0	0	0	0	0	0	0	1.9	2	3	8.7	7.4	12.9	26.1	11	10.8	2.3	19.85	33.55	32.05	1.1	7.1	0.7	6.1	0	0	0	0	0	0
	Con8	0	0	0	0	0	0	0	2.3	0	0	12	2	0	0	13	1.9	13.6	23.1	39.3	43	8.6	8.6	3.1	0	0	0	0	3.3	3.4	0
	Con9	0	0	5.2	0	0	0	0	2.2	0	1.9	2.4	6	7.1	2.1	13.2	13.9	3	30.75	41.2	41.2	2.4	12.6	0	1.9	0	2.1	0	2.1	4.1	2.9
	Con10	0	7.6	0	0	2	2.9	0	0	0	10.5	14.4	18.1	17.4	2.2	8.5	0	0	32.8	36.65	27.35	9.3	5.4	0	0	4.3	0	2.1	2.3	0	2.6
	TetTox1	0	2.4	0	0	0	0	2.4	0	2.1	5.2	0	3.1	0	4.4	0	0	2.2	18.65	37.35	32.1	2.2	10	1.1	2.25	1.2	0	0	0.95	0	0
	TetTox2	2.2	2.2	0	5.5	4.6	2.8	2.2	0	0	0	0	0	0	0.9	0.4	2.6	0	36.9	23	32.05	0	1.7	3	0	1.4	1.15	6.45	2.75	0	1.45
	TetTox3	0	0	0	0	0	0	0	0	0	0	0	0	0	0	0	0	0	39.25	32.2	35.35	0.7	6.4	4.85	2.6	0	0	0	0	0	0
	TetTox4	0	0	0	0	0	0	0	0	0	0	0	0	0	0	0	0	0	37.65	36.35	41.3	2.7	3.1	5.5	5.35	4.35	3.45	7.85	2.75	6	8.9
	TetTox5	0	10.9	0	4.8	4.8	2.8	2.5	6.3	5.4	2.4	2.2	1.4	4.7	2.2	0	0	2.2	18.4	20.75	35.75	7.5	1.6	3.5	0	0	0	0	6.8	2.8	16.3
	TetTox6	0	0	0	0	6.3	5.4	2.4	2.2	7.4	0	0	0	0	5.7	2.1	10.9	0	23.25	22.5	31.1	2.2	0.5	0.2	1.6	0	2	2	1.9	2	0
	TetTox7	2.2	2.2	0	0	0	5.3	10	8.7	0	0	0	0	6.9	2.6	6.6	0	0	26.4	23.5	20.3	2.7	0.6	6.4	2.8	1.9	2.1	0	3	3	0
	TetTox8	6	0	0	0	0	3	2.4	2.4	0	6	3.4	0	0	0	0	0	2.4	38.75	22.2	35.95	1.9	0.4	0	6.2	8.6	13.6	2.5	6.3	8.7	2.8
	TetTox9	3.1	2	2.1	0	0	8.2	3.2	4.3	0	0	0	14.9	2.3	1.4	8.3	2.8	2.1	23.65	37.35	31.45	4.7	0.7	0	0	0	0	0	0	4.1	0
	TetTox10	0	1.9	2	0	2.1	0	0	0	1.9	6	11.1	0	3.5	2.1	0	0	0	19.35	38.4	29.1	6.8	3.6	8.2	4.5	2.3	8.8	2	0	9	2.1
