# Supplementary material for: Parabrachial CGRP neurons modulate active defensive behavior under a naturalistic threat
Source: eLife. 2025 Jan 10;14:e101523. doi: 10.7554/eLife.101523 (PMC11798572; doi:10.7554/eLife.101523)
Supplement: Supplementary file 1. [file elife-101523-supp1.xlsx]

## Sheet: Sheet1
Figure	Samples	Statistical Test	Results	Statistic
Figure 1I	Average firing rate of pinprick, tail pinch, robot	One-way ANOVA with Bonferroni	F(2, 90) = 35.87, p = .000	Pinprick vs. Tail pinch (p = .000) *** Pinprick vs. Chasing (p = .000) *** Tail pinch vs. Chasing (p = .000) ***
Figure 1-figure supplement 1B	Waveform correlation	t-test	t(181) = 15.16, p = .000
Figure 2B	30s stimulation (ChR2 vs. Jaws vs. control) - all n = 10	Repeated measure two-way ANOVA with Bonferroni	Group F(2, 27) = 172. 78, p = .000 Stim F(13, 351) = 46.42, p = .000 Interaction F(26, 351) = 61.32, p = .000	ChR2 vs. Jaws (p = .000) *** ChR2 vs. Control (p = .000) *** Jaws vs. Control (p = .100)
Figure 3B	Freezing_conditioning (ChR2 vs. Jaws vs. control vs. unpaired) - all n = 10	Repeated measure two-way ANOVA with Bonferroni	Group F(3, 36) = 5.50, p = .003 Trial F(4, 144) = 20.71, p = .000 Interaction F(12, 144) = 1.09, p = .37	ChR2 vs. Control (p = 0.99) ChR2 vs. Jaws (p = .051) ChR2 vs. unpaired (p = .048) Control vs. Jaws (p = .029) Control vs. unpaired (p = .032) Jaws vs. unpaired (p = .992)
Figure 3C	Flight score_conditioning (ChR2 vs. Jaws vs. control vs. unpaired) - all n = 10	Repeated measure two-way ANOVA with Bonferroni	Group F(3, 36) = 102.05, p = .000 Trial F(4, 144) = 11.16, p = .000 Interaction F(12, 144) = 3.74, p = .000	ChR2 vs. Control (p = .000) ChR2 vs. Jaws (p = .000) ChR2 vs. unpaired (p = .000) Control vs. Jaws (p = .000) Control vs. unpaired (p = .018) Jaws vs. unpaired (p = .076)
Figure 3D	Velocity_conditioning (ChR2 vs. Jaws vs. control vs. unpaired) - all n = 10	Repeated measure two-way ANOVA with Bonferroni	Group F(3, 36) = 20.47, p = .000 Velocity F(6, 216) = 1.26, p = .28 Interaction F(18, 216) = 0.88, p = .59	ChR2 vs. Control (p = .000) ChR2 vs. Jaws (p = .000) ChR2 vs. unpaired (p = .000)
Figure 3E	Freezing_test (ChR2 vs. Jaws vs. control vs. unpaired) - all n = 10	One-way ANOVA with Bonferroni	F(3, 36) = 10.82, p = .000	ChR2 vs. Control (p = .000) ChR2 vs. Jaws (p = .21) ChR2 vs. unpaired (p = .99) Control vs. Jaws (p = .058) Control vs. unpaired (p = .000) Jaws vs. unpaired (p = .46)
Figure 3F	Flight score_test (ChR2 vs. Jaws vs. control vs. unpaired) - all n = 10	One-way ANOVA with Bonferroni	F(3, 36) = 50.56, p = .000	ChR2 vs. Control (p = .000) ChR2 vs. Jaws (p = .000) ChR2 vs. unpaired (p = .000) Control vs. Jaws (p = .59) Control vs. unpaired (p = .028) Jaws vs. unpaired (p = 1.000)
Figure 3-figure supplement 1C	Bumping (ChR2 vs. Jaws vs. control vs. unpaired) - all n = 10	Repeated measure two-way ANOVA with Bonferroni	Group F(3, 36) = 1.41, p = .26 Trial F(4, 144) = 1.75, p = .14 Interaction F(8, 108) = .41, p = .96
Figure 3-figure supplement 1D	Velocity_test (ChR2 vs. Jaws vs. control vs. unpaired) - all n = 10	Repeated measure two-way ANOVA with Bonferroni	Group F(3, 36) = 56.65, p = .000 Velocity F(9, 324) = .42, p = .923 Interaction F(27, 324) = .82, p = .73	ChR2 vs. Control (p = .000) ChR2 vs. Jaws (p = .000) ChR2 vs. unpaired (p = .000)
Figure 4B	Freezing_conditioning (ChR2 vs. Jaws vs. control) - all n = 10	Repeated measure two-way ANOVA with Bonferroni	Group F(2, 27) = 19.74, p = .000 Trial F(4, 108) = 26.92, p = .002 Interaction F(8, 108) = 3.13, p = .003	ChR2 vs. Jaws (p = .000) *** ChR2 vs. Control (p = .084) Jaws vs. Control (p = .002) **
Figure 4C	Flight score_conditioning (ChR2 vs. Jaws vs. control) - all n = 10	Repeated measure two-way ANOVA with Bonferroni	Group F(2, 27) = 8.91, p = .001 Trial F(4, 108) = 2.24, p = .07 Interaction F(8, 108) = 1.38, p = .215	ChR2 vs. Jaws (p = .001) ** ChR2 vs. Control (p = .72) Jaws vs. Control (p = .02) *
Figure 4C	Flight score_conditioning_Hab	One-way ANOVA with Bonferroni	F(2, 27) = 9.37, p = .001	ChR2 vs. Jaws (p = .004) ** ChR2 vs. Control (p = .002) ** Jaws vs. Control (p = 1.00)
Figure 4D	Freezing_test (ChR2 vs. Jaws vs. control) - all n = 10	One-way ANOVA with Bonferroni	F(2, 27) = 13.31, p = .000	ChR2 vs. Jaws (p = .000) *** ChR2 vs. Control (p = .012) * Jaws vs. Control (p = .184)
Figure 4E	Fleeing_test (ChR2 vs. Jaws vs. control) - all n = 10	One-way ANOVA with Bonferroni	F(2, 27) = .12, p = .63	ChR2 vs. Jaws (p = 1.000) ChR2 vs. Control (p = 1.000) Jaws vs. Control (p = 1.000)
Figure 5A	Freezing_condtioning (70 vs. 80 vs. 90) - all n = 8	Repeated measure two-way ANOVA with Bonferroni	Group F(2, 21) = .11, p = .89 Trial F(4, 84) = 13.69, p = .000 Interaction F(8, 84) = 1.11, p = .37
Figure 5B	Flight score_conditioning (70 vs. 80 vs. 90) - all n = 8	Repeated measure two-way ANOVA with Bonferroni	Group F(2, 21) = 76.43, p = .000 Trial F(4, 84) = 13.89, p = .000 Interaction F(8, 84) = 4.78, p = .000	70 vs. 80 (p = 1.000) 70 vs. 90 (p = .000) *** 80 vs. 90 (p = .000) ***
Figure 5C	Velocity_conditioning (70 vs. 80 vs. 90) - all n = 8	Repeated measure two-way ANOVA with Bonferroni	Group F(2, 21) = 8.42, p = .000 Velocity F(6, 126) = 2.44, p = .029 Interaction F(12, 126) = 1.45, p = .15	70 vs. 80 (p = 1.000) 70 vs. 90 (p = .004) ** 80 vs. 90 (p = .009) **
Figure 5D	Freezing_test (70 vs. 80 vs. 90) - all n = 8	One-way ANOVA with Bonferroni	F(2, 21) = 6.60, p = .006	70 vs. 80 (p = .82) 70 vs. 90 (p = .006) ** 80 vs. 90 (p = .042) *
Figure 5D	Freezing_correlation (Robot speed vs. Freezing)	Pearson's correlation	r = -.608, p = .002
Figure 5E	Flight score_test (70 vs. 80 vs. 90) - all n = 8	One-way ANOVA with Bonferroni	F(2, 21) = 58.09, p = .000	70 vs. 80 (p = 1.000) 70 vs. 90 (p = .000) *** 80 vs. 90 (p = .000) ***
Figure 5E	Flight score_correlation (Robot speed vs. Fleeing)	Pearson's correlation	r = .82, p = .000
Figure 5-figure supplement 1A	Bumping (70 vs. 80 vs. 90 cm/s) - all n = 8	Repeated measure two-way ANOVA with Bonferroni	Group F(2, 21) = 29.44, p = .000 Trial F(4, 84) = 3.06, p = .021 Interaction F(8, 84) = .752, p = .646	70 vs. 80 (p = .000) *** 70 vs. 90 (p = .000) *** 80 vs. 90 (p = .026) *
Figure 5-figure supplement 1B	Bumping (70 vs. 80 vs. 90 cm/s) - all n = 8	One-way ANOVA with Bonferroni	F(2, 21) = 29.44, p = .000	70 vs. 80 (p = .000) *** 70 vs. 90 (p = .000) *** 80 vs. 90 (p = .026) *
Figure 5-figure supplement 1B	Bumping_correlation (70 vs. 80 vs. 90 cm/s) - all n = 8		r = .85, p = .000
Figure 5-figure supplement 1C	Velocity_test (ChR2 vs. Jaws vs. control vs. unpaired) - all n = 10	Repeated measure two-way ANOVA with Bonferroni	Group F(2, 21) = 38.55, p = .000 Velocity F(9, 189) = 1.09, p = .371 Interaction F(18, 189) = 1.35, p = .159	70 vs. 80 (p = .310) 70 vs. 90 (p = .000) *** 80 vs. 90 (p = .000)***
Figure 6B	Freezing_conditioning (Control vs. TetTox) - all n = 10	Repeated measure two-way ANOVA with Bonferroni	Group F(1, 18) = 6.42, p = .021 Trial F(4, 72) = 10.91, p = .000 Interaction F(4, 72) = 1.39, p = .25	Group difference *
Figure 6C	Flight score_conditioning (Control vs. TetTox) - all n = 10	Repeated measure two-way ANOVA with Bonferroni	Group F(1, 18) = 235.27, p = .000 Trial F(4, 72) = 29.67, p = .000 Interaction F(4, 72) = 19.34, p = .000	Group difference **
Figure 6D	Velocity_conditioning (70 vs. 80 vs. 90) - all n = 8	Repeated measure two-way ANOVA with Bonferroni	Group F(1, 18) = 31.91, p = .000 Velocity F(6, 108) = 1.54, p = .171 Interaction F(6, 108) = 1.10, p = .365	Group difference **
Figure 6E	Freezing_test (Control vs. TetTox) - all n = 10	t-test	t(18) = 2.7, p = .015
Figure 6F	Fleeing_test (Control vs. TetTox) - all n = 10	t-test	t(18) = 6.29, p = .000
Figure 6-figure supplement 1A	Bumping (Control vs. TetTox) - all n = 10	Repeated measure two-way ANOVA with Bonferroni	Group F(1, 18) = .041, p = .842 Trial F(4, 72) = 2.81, p = .032 Interaction F(4,72) = .231, p = .92
Figure 6-figure supplement 1B	Velocity_test (Control vs. TetTox) - all n = 10	Repeated measure two-way ANOVA with Bonferroni	Group F(1, 18) = 43.02, p = .000 Velocity F(9, 162) = 2.16, p = .028 Interaction F(9, 162) = 2.51, p = .01	Group difference ***
